# Supplementary material for: The Complete Chloroplast Genomes of Bulbophyllum (Orchidaceae) Species: Insight into Genome Structure Divergence and Phylogenetic Analysis
Source: MDPI journal article supplement (doi:10.3390/ijms25052665), 2024-02-25
Supplement: s1 [file s1]

## Supplementary Figures

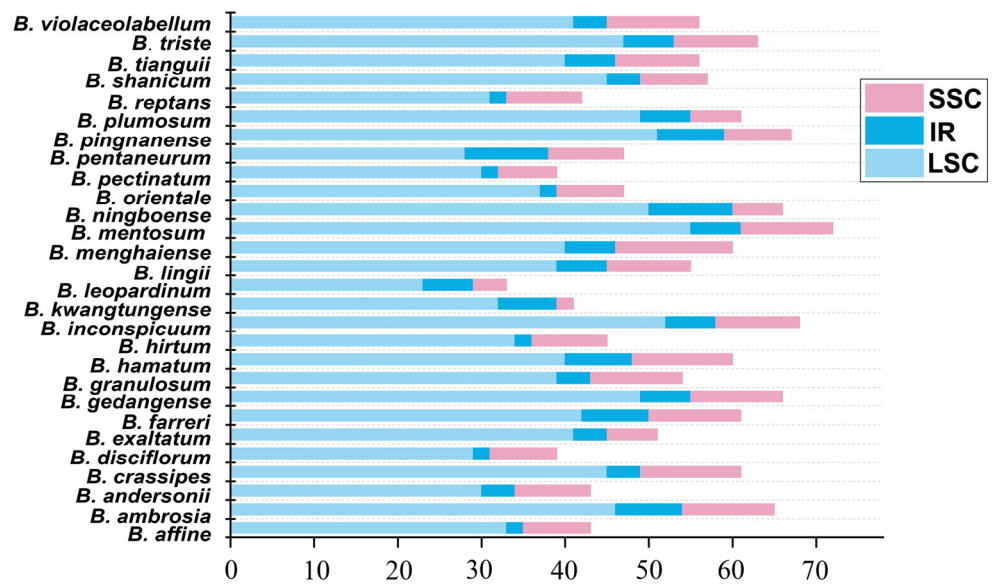

**Supplementary Figure S1** Number of SSRs for each *Bulbophyllum* species by location in IR, LSC, and SSC.

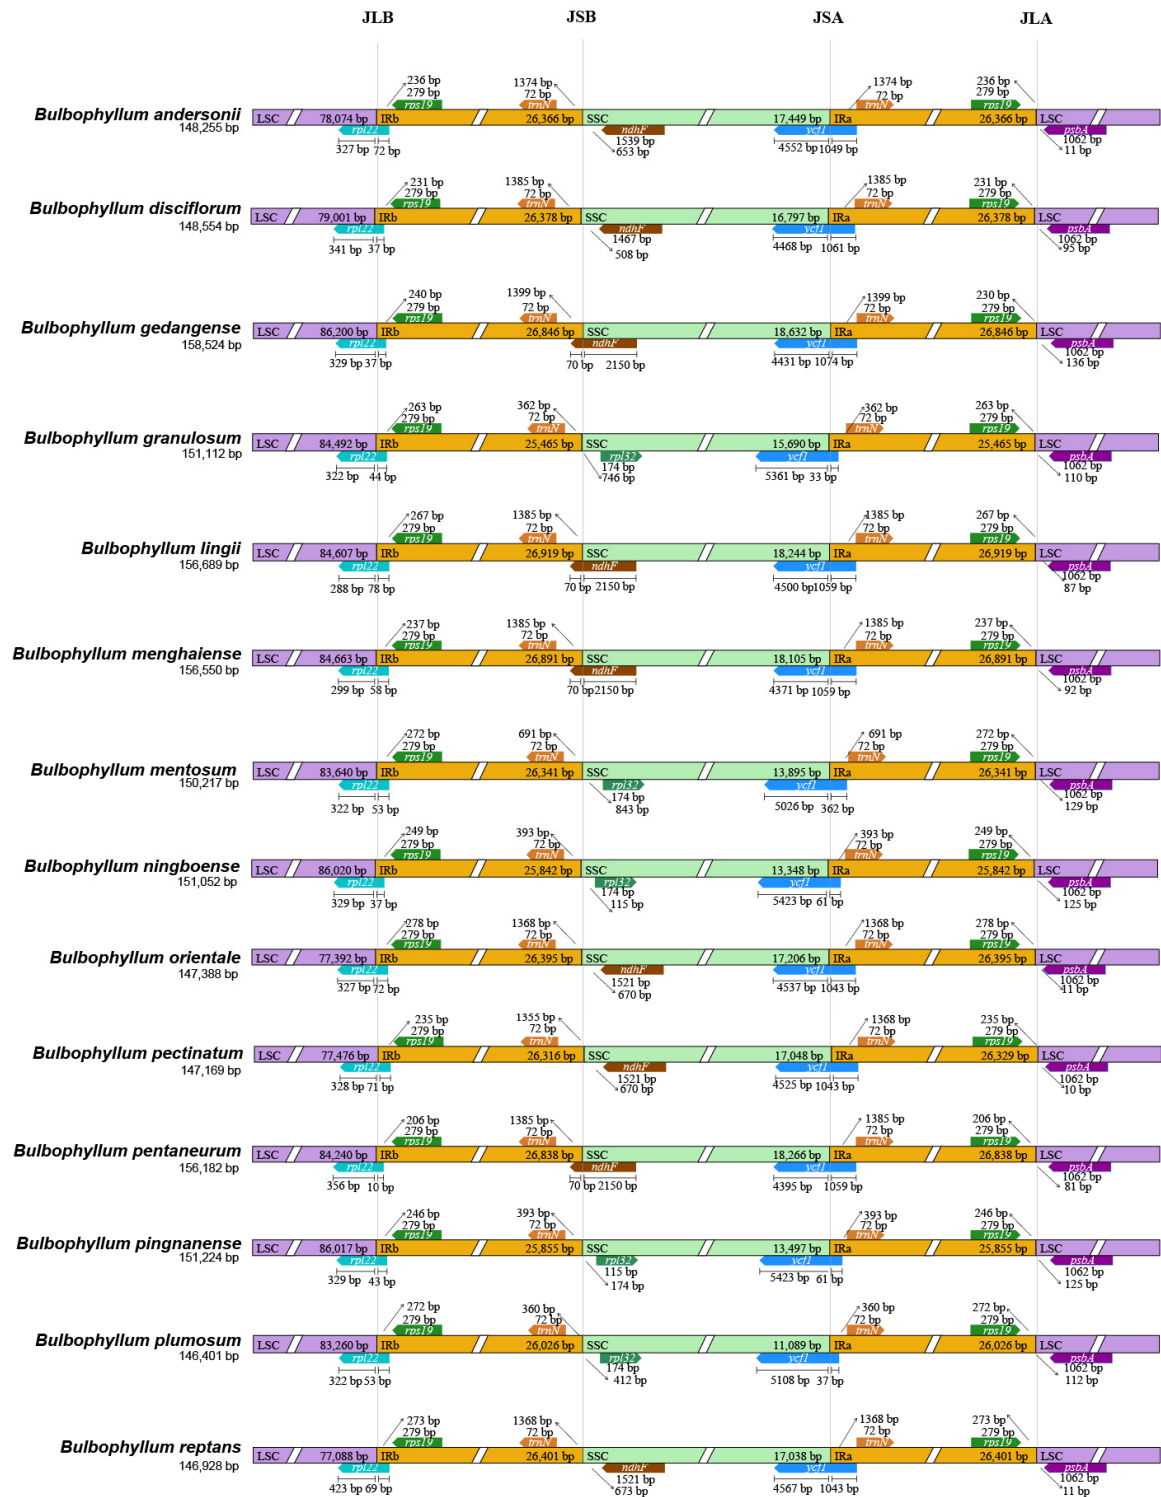

**Supplementary Figure S2** Comparison of junctions between the LSC, SSC, and IR regions among the other 14 *Bulbophyllum* cp genomes.



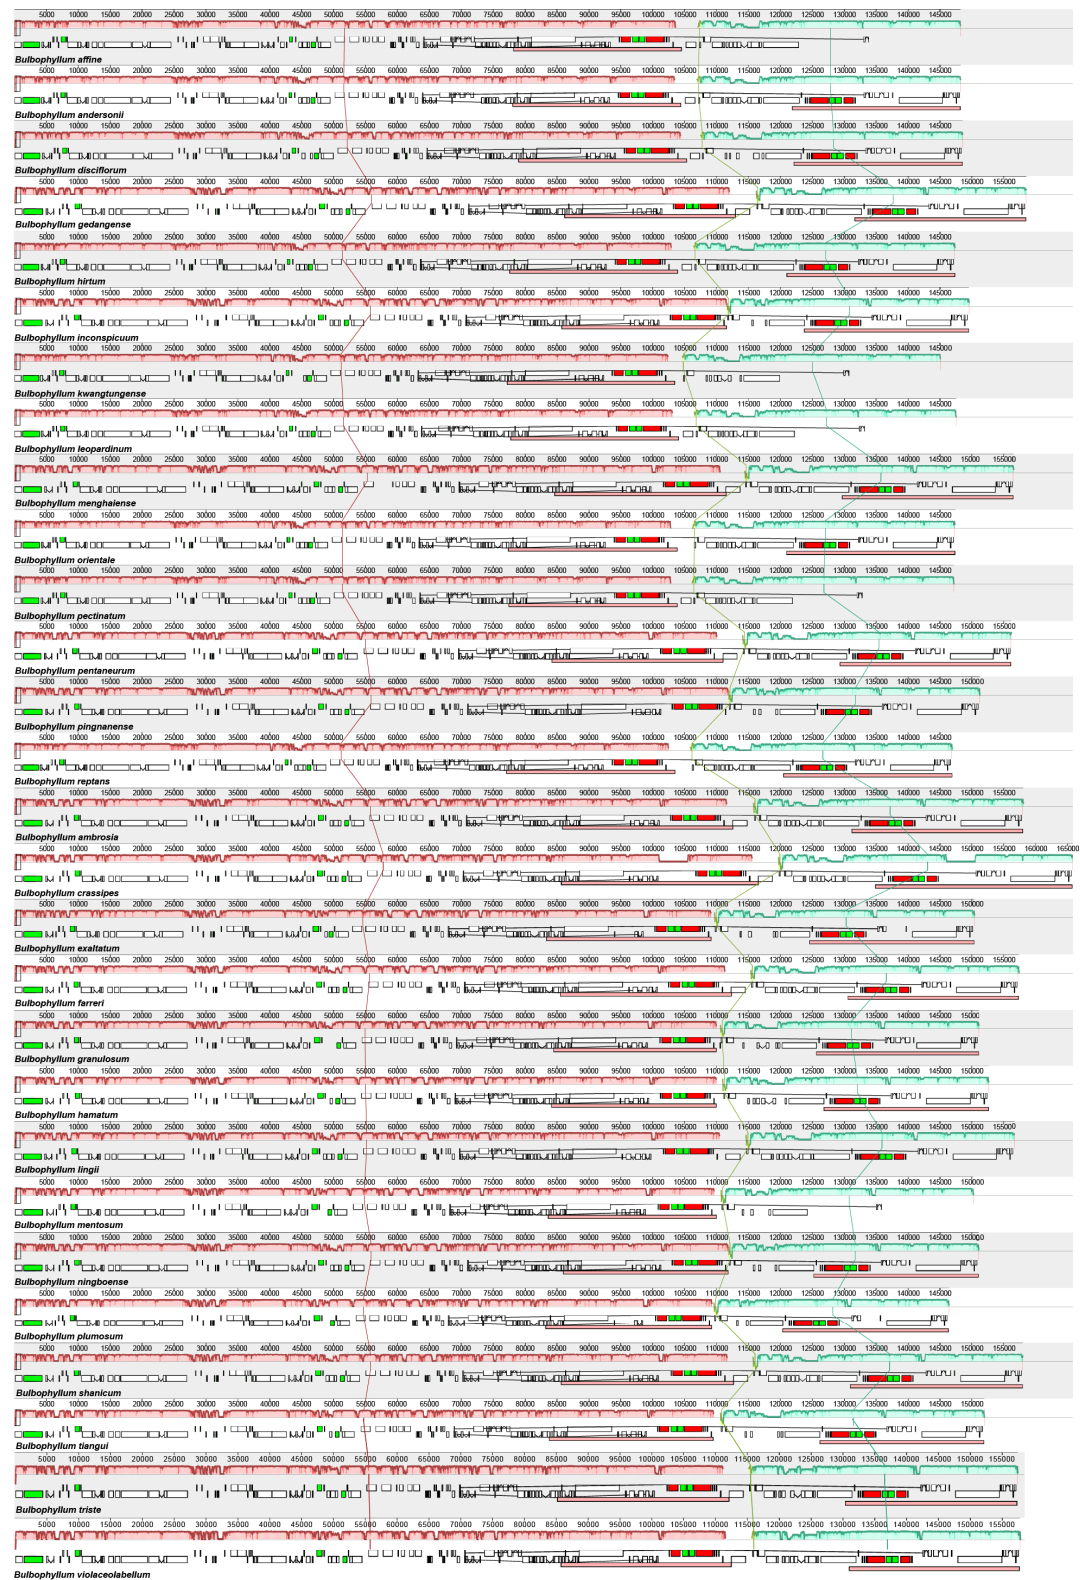

**Supplementary Figure S4** Alignment of the 28 *Bulbophyllum* cp genomes (mauve graphs). Local collinear blocks within each alignment are represented by blocks of the same color connected with lines.

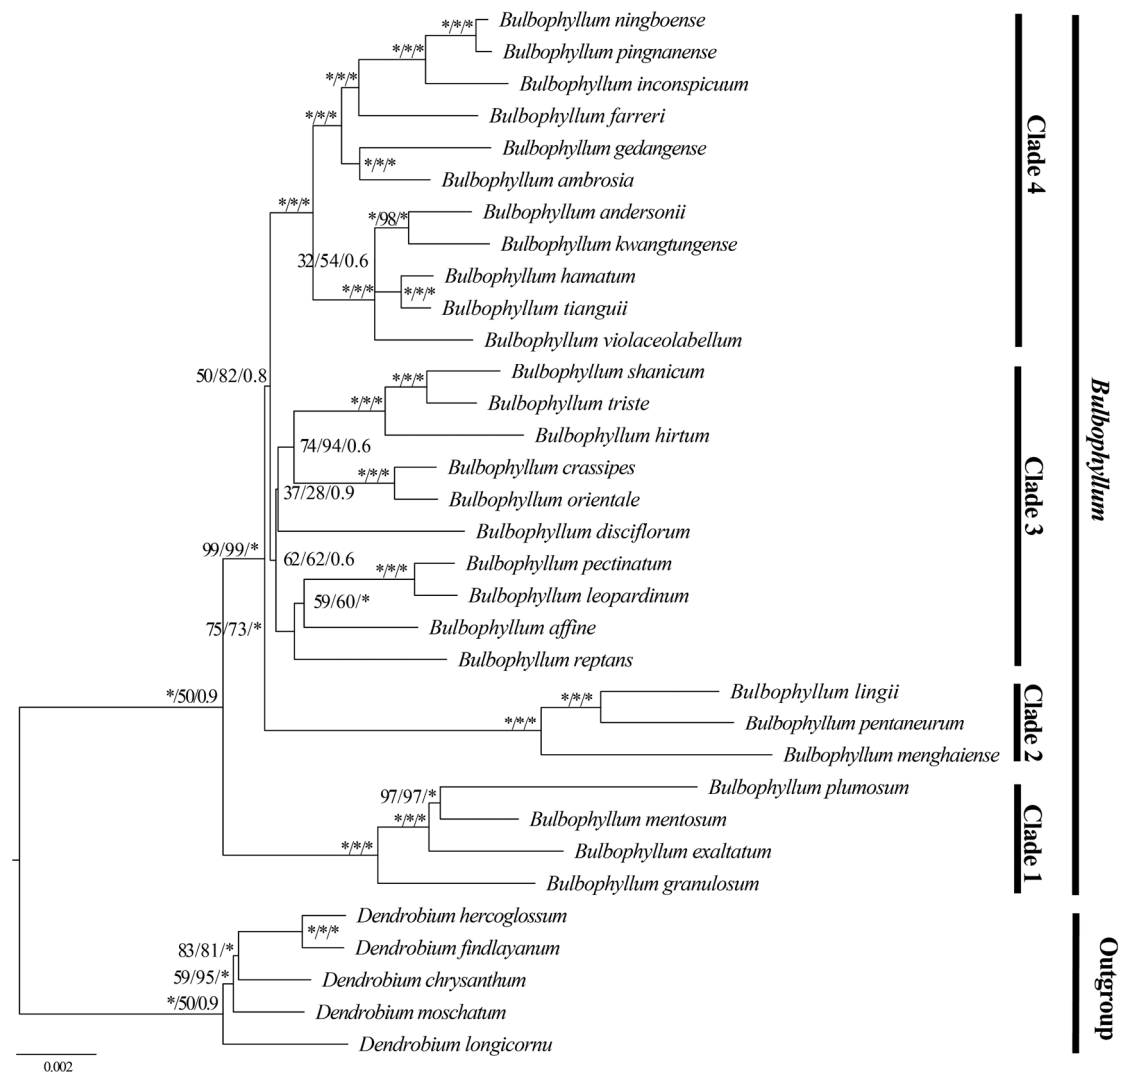

**Supplementary Figure S5** The phylogenetic tree of 28 *Bulbophyllum* species and five outgroups based on concatenated 68 protein-coding genes. The numbers near the nodes are bootstrap percentages and Bayesian posterior probabilities (BP<sub>ML</sub>, BP<sub>MP</sub>, PP), \*node is 100 bootstrap percentage or 1.00 posterior probability.
