# Supplementary material for: The Complete Chloroplast Genomes of Bulbophyllum (Orchidaceae) Species: Insight into Genome Structure Divergence and Phylogenetic Analysis
Source: Int J Mol Sci. 2024 Feb 25;25(5):2665. doi: 10.3390/ijms25052665 (PMC10932260; doi:10.3390/ijms25052665)
Supplement: Supplementary file 1 [file ijms-25-02665-s001.zip › Supplementary Table S1.xlsx]

## Sheet: Sheet1
Supplementary Table S1 Genes present in the chloroplast genomes of Bulbophyllum ambrosia used in this study.
Group of genes	Gene names
Photosystem I	psaA, psaB, psaC, psaI, psaJ
Photosystem II	psbA, psbB, psbC, psbD, psbE, psbF, psbH, psbI, psbJ, psbK, psbL, psbM, psbN, psbT, psbZ
Cytochrome b/f complex	petA, petB*, petD*, petG, petL, petN
ATP synthase	atpA, atpB, atpE, atpF*, atpH, atpI
NADH dehydrogenase	ndhA, ndhB* (×2), ndhC, ndhD, ndhE, ndhF, ndhH, ndhJ, ndhK
Calvin cycle	rbcL
Ribosomal proteins (SSU)	rps2, rps3, rps4, rps7 (×2), rps8, rps11, rps12* (×2), rps14, rps15, rps16*, rps18, rps19 (×2)
Ribosomal proteins (LSU)	rpl2* (×2), rpl14, rpl16, rpl20, rpl22, rpl23 (×2), rpl32, rpl33, rpl36
Transfer RNAs	trnAUGC* (×2), trnCGCA, trnDGUC, trnEUUC, trnFGAA, trnfMCAU, trnGGCC, trnGUCC*, trnHGUG (×2), trnICAU (×2), trnIGAU* (×2), trnKUUU*, trnLCAA (×2), trnLUAA*, trnLUAG, trnMCAU, trnNGUU (×2), trnPUGG, trnQUUG, trnRACG (×2), trnRUCU, trnSGCU, trnSGGA, trnSUGA, trnTGGU, trnTUGU, trnVGAC (×2), trnVUAC*, trnWCCA, trnYGUA
Ribosomal RNAs	rrn4.5 (×2), rrn5 (×2), rrn16 (×2), rrn23 (×2)
RNA polymerase	rpoA, rpoB, rpoC1*, rpoC2
Others	accD, ccsA, clpP**, cemA, infA, matK, ycf1, ycf2 (× 2), ycf3b**, ycf4, ycf15 (× 2)
Note : *Genes with one intron. **Genes with two introns. ×2 duplicated genes. B. hamatum lacked ndhK/C/F/I genes. No gene loss occurred B. crassipes, B. farreri, B. shanicum, B. triste and B.violaceolabellum.
