# Supplementary material for: The Complete Chloroplast Genomes of Bulbophyllum (Orchidaceae) Species: Insight into Genome Structure Divergence and Phylogenetic Analysis
Source: Int J Mol Sci. 2024 Feb 25;25(5):2665. doi: 10.3390/ijms25052665 (PMC10932260; doi:10.3390/ijms25052665)
Supplement: Supplementary file 1 [file ijms-25-02665-s001.zip › Supplementary Table S2.xlsx]

## Sheet: Sheet1
Supplementary Table S2 Types of long repeat sequences among 28 Bulbophyllum chloroplast genomes.
Taxa/Long repeat types	P, palindromic	F, forward	R, reverse	C, complement
B. affine	10	10	3	2
B. ambrosia	20	11	7	2
B. andersonii	9	6	3	0
B. crassipes	21	12	0	0
B. disciflorum	11	18	14	6
B. exaltatum	14	9	4	1
B. farreri	19	10	0	0
B. gedangense	21	14	12	2
B. granulosum	20	11	3	1
B. hamatum	21	12	0	1
B. hirtum	5	8	0	10
B. inconspicuum	25	12	1	1
B. kwangtungense	8	6	3	0
B. leopardinum	10	22	8	0
B. lingii	17	9	1	0
B. menghaiense	20	11	1	0
B. mentosum	17	6	2	1
B. ningboense	23	11	1	1
B. orientale	9	9	3	0
B. pectinatum	11	10	8	1
B. pentaneurum	18	8	1	0
B. pingnanense	25	15	2	1
B. plumosum	20	10	1	2
B. reptans	7	17	25	0
B. shanicum	17	8	1	0
B. tianguii	22	13	2	0
B. triste	14	9	1	3
B. violaceolabellum	23	11	10	4
