# Supplementary material for: The Complete Chloroplast Genomes of Bulbophyllum (Orchidaceae) Species: Insight into Genome Structure Divergence and Phylogenetic Analysis
Source: Int J Mol Sci. 2024 Feb 25;25(5):2665. doi: 10.3390/ijms25052665 (PMC10932260; doi:10.3390/ijms25052665)
Supplement: Supplementary file 1 [file ijms-25-02665-s001.zip › Supplementary Table S3.xlsx]

## Sheet: Sheet1
Supplementary Table S3 Different lengths of long repeat sequences among 28 Bulbophyllum chloroplast genomes.
Taxa/Long repeat length	30–40 bp	40–50 bp	50–60 bp	60–70 bp
B. affine	24	1	0	0
B.ambrosia	31	3	6	0
B. andersonii	18	0	0	0
B.crassipes	21	6	2	4
B. disciflorum	47	2	0	0
B. exaltatum	25	3	0	0
B.farreri	19	5	5	0
B. gedangense	46	2	1	0
B. granulosum	29	5	1	0
B.hamatum	25	3	6	0
B. hirtum	22	1	0	0
B. inconspicuum	25	8	6	0
B. kwangtungense	17	0	0	0
B. leopardinum	38	2	0	0
B. lingii	23	2	1	1
B. menghaiense	28	2	1	1
B. mentosum	23	2	1	0
B. ningboense	24	3	5	0
B. orientale	20	1	0	0
B. pectinatum	25	4	0	0
B. pentaneurum	23	2	1	1
B. pingnanense	31	6	2	4
B. plumosum	30	2	1	0
B. reptans	42	7	0	0
B.shanicum	15	7	1	4
B. tianguii	28	3	6	0
B.triste	17	6	1	4
B.violaceolabellum	38	5	6	0
