# Supplementary material for: The Complete Chloroplast Genomes of Bulbophyllum (Orchidaceae) Species: Insight into Genome Structure Divergence and Phylogenetic Analysis
Source: Int J Mol Sci. 2024 Feb 25;25(5):2665. doi: 10.3390/ijms25052665 (PMC10932260; doi:10.3390/ijms25052665)
Supplement: Supplementary file 1 [file ijms-25-02665-s001.zip › Supplementary Table S4.xlsx]

## Sheet: Sheet1
Supplementary Table S4 Types and amounts of simple sequence repeats (SSRs) in the chloroplast genomes of 28 Bulbophyllum species.
SSR Type	B. affine		B. ambrosia		B. andersonii		B. crassipes		B. disciflorum		B. exaltatum		B. farreri		B. gedangense		B. granulosum		B. hamatum		B. hirtum		B. inconspicuum		B. kwangtungense		B. leopardinum		B. lingii		B. menghaiense		B. mentosum		B. ningboense		B. orientale		B. pectinatum		B. pentaneurum		B. pingnanense		B. plumosum		B. reptans		B. shanicum
	Number	Ration	Number	Ration	Number	Ration	Number	Ration	Number	Ration	Number	Ration	Number	Ration	Number	Ration	Number	Ration	Number	Ration	Number	Ration	Number	Ration	Number	Ration	Number	Ration	Number	Ration	Number	Ration	Number	Ration	Number	Ration	Number	Ration	Number	Ration	Number	Ration	Number	Ration	Number	Ration	Number	Ration	Number
		(%)		(%)		(%)		(%)		(%)		(%)		(%)		(%)		(%)		(%)		(%)		(%)		(%)		(%)		(%)		(%)		(%)		(%)		(%)		(%)		(%)		(%)		(%)		(%)
mono-	30	62.5	58	81.6901	36	72	52	75.3623	34	70.8333	42	75	52	78.7879	62	80.5195	37	62.7119	51	77.2727	35	70	55	74.3243	33	76.7442	26	68.4211	35	58.3333	44	64.7059	57	71.25	57	73.0769	37	68.5185	31	70.4545	31	63.2653	57	74.026	47	65.2778	35	74.4681	48
di-	7	14.5833	10	14.0845	6	12	10	14.4928	9	18.75	8	14.2857	9	13.6364	9	11.6883	13	22.0339	8	12.1212	6	12	13	17.5676	6	13.9535	7	18.4211	12	20	6	8.82353	10	12.5	12	15.3846	9	16.6667	8	18.1818	6	12.2449	12	15.5844	14	19.4444	6	12.766	7
tri-	1	2.08333	0	0	1	2	2	2.89855	0	0	0	0	0	0	1	1.2987	2	3.38983	2	3.0303	1	2	3	4.05405	0	0	0	0	3	5	4	5.88235	3	3.75	3	3.84615	2	3.7037	0	0	3	6.12245	2	2.5974	0	0	0	0	0
tetra-	7	14.5833	3	4.22535	6	12	5	7.24638	5	10.4167	5	8.92857	3	4.54545	2	2.5974	6	10.1695	4	6.06061	7	14	3	4.05405	4	9.30233	4	10.5263	8	13.3333	12	17.6471	5	6.25	5	6.41026	5	9.25926	4	9.09091	7	14.2857	5	6.49351	7	9.72222	3	6.38298	6
penta-	2	4.16667	0	0	1	2	0	0	0	0	1	1.78571	0	0	2	2.5974	1	1.69492	0	0	1	2	0	0	0	0	1	2.63158	2	3.33333	2	2.94118	5	6.25	0	0	1	1.85185	1	2.27273	0	0	0	0	3	4.16667	3	6.38298	1
hexa-	1	2.08333	0	0	0	0	0	0	0	0	0	0	2	3.0303	1	1.2987	0	0	1	1.51515	0	0	0	0	0	0	0	0	0	0	0	0	0	0	1	1.28205	0	0	0	0	2	4.08163	1	1.2987	1	1.38889	0	0	0
Total	48	100	71	100	50	100	69	100	48	100	56	100	66	100	77	100	59	100	66	100	50	100	74	100	43	100	38	100	60	100	68	100	80	100	78	100	54	100	44	100	49	100	77	100	72	100	47	100	62
[truncated: 7 more columns]
