# Supplementary material for: The Complete Chloroplast Genomes of Bulbophyllum (Orchidaceae) Species: Insight into Genome Structure Divergence and Phylogenetic Analysis
Source: Int J Mol Sci. 2024 Feb 25;25(5):2665. doi: 10.3390/ijms25052665 (PMC10932260; doi:10.3390/ijms25052665)
Supplement: Supplementary file 1 [file ijms-25-02665-s001.zip › Supplementary Table S5.xlsx]

## Sheet: Sheet1
Supplementary Table S5 Simple sequence repeats (SSRs) among 28 Bulbophyllum chloroplast genomes.
Taxa	SSR	Frequency
B. affine	A/T	30
B. affine	AAAAG/CTTTT	1
B. affine	AAAAT/ATTTT	1
B. affine	AAAT/ATTT	2
B. affine	AATC/ATTG	1
B. affine	AATGGG/ATTCCC	1
B. affine	AATT/AATT	2
B. affine	ACAG/CTGT	1
B. affine	AG/CT	2
B. affine	AGAT/ATCT	1
B. affine	AT/AT	5
B. affine	ATC/ATG	1
B. ambrosia	A/T	58
B. ambrosia	AAAT/ATTT	1
B. ambrosia	AATT/AATT	1
B. ambrosia	ACAG/CTGT	1
B. ambrosia	AG/CT	2
B. ambrosia	AT/AT	8
B. andersonii	A/T	36
B. andersonii	AAAAG/CTTTT	1
B. andersonii	AAAT/ATTT	3
B. andersonii	AAT/ATT	1
B. andersonii	AATT/AATT	1
B. andersonii	ACAG/CTGT	1
B. andersonii	AG/CT	2
B. andersonii	AGAT/ATCT	1
B. andersonii	AT/AT	4
B. crassipes	A/T	52
B. crassipes	AAAT/ATTT	1
B. crassipes	AAT/ATT	1
B. crassipes	AATT/AATT	1
B. crassipes	ACAG/CTGT	1
B. crassipes	ACT/AGT	1
B. crassipes	AG/CT	2
B. crassipes	AGAT/ATCT	2
B. crassipes	AT/AT	8
B. disciflorum	A/T	34
B. disciflorum	AATC/ATTG	1
B. disciflorum	AATT/AATT	2
B. disciflorum	ACAG/CTGT	1
B. disciflorum	AG/CT	2
B. disciflorum	AGAT/ATCT	1
B. disciflorum	AT/AT	7
B. exaltatum	A/T	42
B. exaltatum	AAAT/ATTT	2
B. exaltatum	AAGT/ACTT	1
B. exaltatum	AATAT/ATATT	1
B. exaltatum	AATT/AATT	1
B. exaltatum	ACAG/CTGT	1
B. exaltatum	AG/CT	2
B. exaltatum	AT/AT	6
B. farreri	A/T	52
B. farreri	AAATCC/ATTTGG	2
B. farreri	AATT/AATT	1
B. farreri	AC/GT	1
B. farreri	ACAG/CTGT	1
B. farreri	AG/CT	2
B. farreri	AGAT/ATCT	1
B. farreri	AT/AT	6
B. gedangense	A/T	62
B. gedangense	AAAAT/ATTTT	1
B. gedangense	AAT/ATT	1
B. gedangense	AATAT/ATATT	1
B. gedangense	AATT/AATT	1
B. gedangense	ACAG/CTGT	1
B. gedangense	AG/CT	3
B. gedangense	AGATAT/ATATCT	1
B. gedangense	AT/AT	6
B. granulosum	A/T	37
B. granulosum	AAAG/CTTT	1
B. granulosum	AAAT/ATTT	2
B. granulosum	AAATG/ATTTC	1
B. granulosum	AAG/CTT	2
B. granulosum	AAGT/ACTT	1
B. granulosum	AATT/AATT	1
B. granulosum	ACAG/CTGT	1
B. granulosum	AG/CT	2
B. granulosum	AT/AT	11
B. hamatum	A/T	51
B. hamatum	AAAT/ATTT	1
B. hamatum	AAT/ATT	2
B. hamatum	AATT/AATT	1
B. hamatum	ACAG/CTGT	1
B. hamatum	AG/CT	2
B. hamatum	AGAT/ATCT	1
B. hamatum	AT/AT	6
B. hamatum	ATCCCC/ATGGGG	1
B. hirtum	A/T	35
B. hirtum	AAAG/CTTT	2
B. hirtum	AAAT/ATTT	1
B. hirtum	AAT/ATT	1
B. hirtum	AATCT/AGATT	1
B. hirtum	AATT/AATT	1
B. hirtum	ACAG/CTGT	1
B. hirtum	ACCG/CGGT	1
B. hirtum	AG/CT	2
B. hirtum	AGAT/ATCT	1
B. hirtum	AT/AT	4
B. inconspicuum	A/T	55
B. inconspicuum	AAT/ATT	3
B. inconspicuum	AATT/AATT	1
B. inconspicuum	ACAG/CTGT	1
B. inconspicuum	AG/CT	2
B. inconspicuum	AGAT/ATCT	1
B. inconspicuum	AT/AT	11
B. kwangtungense	A/T	33
B. kwangtungense	AAAG/CTTT	1
B. kwangtungense	AATT/AATT	1
B. kwangtungense	ACAG/CTGT	1
B. kwangtungense	AG/CT	2
B. kwangtungense	AGAT/ATCT	1
B. kwangtungense	AT/AT	4
B. leopardinum	A/T	26
B. leopardinum	AAAT/ATTT	1
B. leopardinum	AATT/AATT	1
B. leopardinum	ACAG/CTGT	1
B. leopardinum	AG/CT	2
B. leopardinum	AGAT/ATCT	1
B. leopardinum	AGATG/ATCTC	1
B. leopardinum	AT/AT	5
B. lingii	A/T	35
B. lingii	AAAG/CTTT	2
B. lingii	AAAT/ATTT	2
B. lingii	AAC/GTT	1
B. lingii	AAGAT/ATCTT	1
B. lingii	AAT/ATT	2
B. lingii	AATAT/ATATT	1
B. lingii	AATT/AATT	1
B. lingii	ACAG/CTGT	1
B. lingii	AG/CT	2
B. lingii	AGGG/CCCT	2
B. lingii	AT/AT	10
B. menghaiense	A/T	44
B. menghaiense	AAAT/ATTT	2
B. menghaiense	AAATC/ATTTG	1
B. menghaiense	AAG/CTT	1
B. menghaiense	AAGT/ACTT	1
B. menghaiense	AAT/ATT	3
B. menghaiense	AATC/ATTG	1
B. menghaiense	AATG/ATTC	2
B. menghaiense	AATT/AATT	2
B. menghaiense	ACAG/CTGT	1
B. menghaiense	ACAGT/ACTGT	1
B. menghaiense	AG/CT	2
B. menghaiense	AGAT/ATCT	1
B. menghaiense	AGGG/CCCT	2
B. menghaiense	AT/AT	4
B. mentosum	A/T	57
B. mentosum	AAAAT/ATTTT	1
B. mentosum	AAAT/ATTT	2
B. mentosum	AAG/CTT	1
B. mentosum	AAGT/ACTT	1
B. mentosum	AAT/ATT	2
B. mentosum	AATAT/ATATT	3
B. mentosum	AATT/AATT	1
B. mentosum	ACAG/CTGT	1
B. mentosum	ACTAT/AGTAT	1
B. mentosum	AG/CT	2
B. mentosum	AT/AT	8
B. ningboense	A/T	57
B. ningboense	AAAT/ATTT	1
B. ningboense	AAGT/ACTT	1
B. ningboense	AAT/ATT	3
B. ningboense	AATATG/ATATTC	1
B. ningboense	AATT/AATT	1
B. ningboense	ACAG/CTGT	1
B. ningboense	AG/CT	2
B. ningboense	AGAT/ATCT	1
B. ningboense	AT/AT	10
B. orientale	A/T	37
B. orientale	AAAAG/CTTTT	1
B. orientale	AAAT/ATTT	1
B. orientale	AAT/ATT	1
B. orientale	AATT/AATT	1
B. orientale	ACAG/CTGT	1
B. orientale	ACT/AGT	1
B. orientale	AG/CT	2
B. orientale	AGAT/ATCT	2
B. orientale	AT/AT	7
B. pectinatum	A/T	31
B. pectinatum	AAAT/ATTT	1
B. pectinatum	AATT/AATT	1
B. pectinatum	ACAG/CTGT	1
B. pectinatum	AG/CT	2
B. pectinatum	AGAT/ATCT	1
B. pectinatum	AGATG/ATCTC	1
B. pectinatum	AT/AT	6
B. pentaneurum	A/T	31
B. pentaneurum	AAAG/CTTT	1
B. pentaneurum	AAAT/ATTT	2
B. pentaneurum	AAC/GTT	1
B. pentaneurum	AAG/CTT	1
B. pentaneurum	AAT/ATT	1
B. pentaneurum	AATT/AATT	1
B. pentaneurum	ACAG/CTGT	1
B. pentaneurum	ACAGAG/CTCTGT	2
B. pentaneurum	AG/CT	2
B. pentaneurum	AGGG/CCCT	2
B. pentaneurum	AT/AT	4
B. pingnanense	A/T	57
B. pingnanense	AAAT/ATTT	1
B. pingnanense	AAGT/ACTT	1
B. pingnanense	AAT/ATT	2
B. pingnanense	AATATG/ATATTC	1
B. pingnanense	AATT/AATT	1
B. pingnanense	ACAG/CTGT	1
B. pingnanense	AG/CT	2
B. pingnanense	AGAT/ATCT	1
B. pingnanense	AT/AT	10
B. plumosum	A/T	47
B. plumosum	AAAT/ATTT	4
B. plumosum	AAGT/ACTT	1
B. plumosum	AATAT/ATATT	3
B. plumosum	AATT/AATT	1
B. plumosum	AATTAC/AATTGT	1
B. plumosum	ACAG/CTGT	1
B. plumosum	AG/CT	2
B. plumosum	AT/AT	12
B. reptans	A/T	35
B. reptans	AAAAG/CTTTT	1
B. reptans	AAAAT/ATTTT	1
B. reptans	AACAG/CTGTT	1
B. reptans	AATT/AATT	1
B. reptans	ACAG/CTGT	1
B. reptans	AG/CT	2
B. reptans	AGAT/ATCT	1
B. reptans	AT/AT	4
B. shanicum	A/T	48
B. shanicum	AAAG/CTTT	2
B. shanicum	AATCT/AGATT	1
B. shanicum	AATT/AATT	1
B. shanicum	ACAG/CTGT	1
B. shanicum	AG/CT	3
B. shanicum	AGAT/ATCT	1
B. shanicum	AT/AT	4
B. shanicum	CCCG/CGGG	1
B. tianguii	A/T	50
B. tianguii	AAAAG/CTTTT	2
B. tianguii	AATT/AATT	1
B. tianguii	ACAG/CTGT	1
B. tianguii	AG/CT	2
B. tianguii	AGAT/ATCT	1
B. tianguii	AT/AT	5
B. triste	A/T	51
B. triste	AAAAG/CTTTT	1
B. triste	AAAAT/ATTTT	1
B. triste	AAAG/CTTT	2
B. triste	AAAT/ATTT	2
B. triste	AAATG/ATTTC	1
B. triste	AACC/GGTT	1
B. triste	AAT/ATT	1
B. triste	AATCT/AGATT	1
B. triste	AATT/AATT	1
B. triste	ACAG/CTGT	1
B. triste	ACCG/CGGT	1
B. triste	AG/CT	2
B. triste	AT/AT	6
B. triste	C/G	1
B. violaceolabellum	A/T	47
B. violaceolabellum	AAGGG/CCCTT	1
B. violaceolabellum	AAT/ATT	1
B. violaceolabellum	AATT/AATT	1
B. violaceolabellum	ACAG/CTGT	1
B. violaceolabellum	AG/CT	2
B. violaceolabellum	AGAT/ATCT	1
B. violaceolabellum	AT/AT	8
B. violaceolabellum	ATC/ATG	1
