# Supplementary material for: The Complete Chloroplast Genomes of Bulbophyllum (Orchidaceae) Species: Insight into Genome Structure Divergence and Phylogenetic Analysis
Source: Int J Mol Sci. 2024 Feb 25;25(5):2665. doi: 10.3390/ijms25052665 (PMC10932260; doi:10.3390/ijms25052665)
Supplement: Supplementary file 1 [file ijms-25-02665-s001.zip › Supplementary Table S6.xlsx]

## Sheet: Sheet1
Supplementary Table S6 The relative synonymous codon usage (RSCU) values of all 64 codons for the 28 Bulbophyllum chloroplast genomes.
AAA	Codon	B. affine		B. andersonii		B.disciflorum		B. exaltatum		B. gedangense		B. granulosum		B. hirtum		B. inconspicuum		B. kwangtungense		B. leopardinum		B. lingii		B. menghaiense		B. mentosum		B. ningboense		B. orientale		B. pectinatum		B. pentaneurum		B. pingnanense		B.plumosum		B. reptans		B. tianguii		B. ambrosia		B. crassipes		B. farreri
		Frequency	RSCU	Frequency	RSCU	Frequency	RSCU	Frequency	RSCU	Frequency	RSCU	Frequency	RSCU	Frequency	RSCU	Frequency	RSCU	Frequency	RSCU	Frequency	RSCU	Frequency	RSCU	Frequency	RSCU	Frequency	RSCU	Frequency	RSCU	Frequency	RSCU	Frequency	RSCU	Frequency	RSCU	Frequency	RSCU	Frequency	RSCU	Frequency	RSCU	Frequency	RSCU	Frequency	RSCU	Frequency	RSCU	Frequency	RSCU
*	UAA	21	1.26	22	1.32	19	1.2955	20	1.4634	21	1.2857	17	1.275	23	1.38	19	1.2955	21	1.3696	20	1.2	20	1.1765	20	1.2245	18	1.3171	18	1.2	21	1.2857	22	1.32	20	1.2	18	1.2	18	1.3846	20	1.2245	18	1.2558	21	1.2353	52	1.1143	53	1.1357
*	UAG	15	0.9	15	0.9	12	0.8182	11	0.8049	14	0.8571	12	0.9	15	0.9	13	0.8864	14	0.913	16	0.96	15	0.8824	12	0.7347	13	0.9512	16	1.0667	15	0.9184	15	0.9	14	0.84	16	1.0667	11	0.8462	15	0.9184	14	0.9767	16	0.9412	44	0.9429	44	0.9429
*	UGA	14	0.84	13	0.78	13	0.8864	10	0.7317	14	0.8571	11	0.825	12	0.72	12	0.8182	11	0.7174	14	0.84	16	0.9412	17	1.0408	10	0.7317	11	0.7333	13	0.7959	13	0.78	16	0.96	11	0.7333	10	0.7692	14	0.8571	11	0.7674	14	0.8235	44	0.9429	43	0.9214
Ala	GCA	332	1.2251	330	1.2245	307	1.2051	296	1.2463	336	1.2399	299	1.2394	334	1.2336	305	1.2336	317	1.2493	329	1.2174	339	1.2205	326	1.2337	296	1.2231	307	1.2305	321	1.2264	329	1.2208	329	1.2196	306	1.2289	286	1.2328	323	1.2375	301	1.2248	346	1.2502	375	1.2146	380	1.2268
Ala	GCC	148	0.5461	150	0.5566	140	0.5496	124	0.5221	148	0.5461	128	0.5306	145	0.5355	132	0.5339	135	0.532	145	0.5365	147	0.5293	138	0.5222	127	0.5248	131	0.5251	143	0.5463	147	0.5455	138	0.5116	130	0.5221	117	0.5043	144	0.5517	132	0.5371	154	0.5565	187	0.6057	185	0.5973
Ala	GCG	96	0.3542	96	0.3562	92	0.3611	89	0.3747	93	0.3432	92	0.3813	94	0.3472	92	0.3721	95	0.3744	99	0.3663	98	0.3528	90	0.3406	94	0.3884	93	0.3727	96	0.3668	95	0.3525	95	0.3522	93	0.3735	89	0.3836	98	0.3755	96	0.3906	94	0.3397	129	0.4178	131	0.4229
Ala	GCU	508	1.8745	502	1.8627	480	1.8842	441	1.8568	507	1.8708	446	1.8487	510	1.8837	460	1.8605	468	1.8443	508	1.8797	527	1.8974	503	1.9035	451	1.8636	467	1.8717	487	1.8606	507	1.8813	517	1.9166	467	1.8755	436	1.8793	479	1.8352	454	1.8474	513	1.8537	544	1.7619	543	1.753
Cys	UGC	56	0.4828	55	0.4783	59	0.5413	50	0.5319	56	0.4807	51	0.5126	58	0.5022	55	0.534	55	0.5	57	0.4893	58	0.4659	54	0.4737	52	0.5253	55	0.5288	58	0.5066	58	0.4957	56	0.4766	56	0.5385	50	0.5348	56	0.4956	54	0.532	57	0.481	87	0.6063	88	0.6175
Cys	UGU	176	1.5172	175	1.5217	159	1.4587	138	1.4681	177	1.5193	148	1.4874	173	1.4978	151	1.466	165	1.5	176	1.5107	191	1.5341	174	1.5263	146	1.4747	153	1.4712	171	1.4934	176	1.5043	179	1.5234	152	1.4615	137	1.4652	170	1.5044	149	1.468	180	1.519	200	1.3937	197	1.3825
Asp	GAC	154	0.3752	150	0.3686	148	0.3829	142	0.3912	162	0.3848	143	0.3849	153	0.3745	150	0.3866	148	0.3869	155	0.378	158	0.3722	147	0.3661	144	0.3871	153	0.3913	150	0.3695	157	0.3815	154	0.3697	154	0.3914	139	0.385	150	0.3708	147	0.3874	165	0.3878	189	0.4136	193	0.4242
Asp	GAU	667	1.6248	664	1.6314	625	1.6171	584	1.6088	680	1.6152	600	1.6151	664	1.6255	626	1.6134	617	1.6131	665	1.622	691	1.6278	656	1.6339	600	1.6129	629	1.6087	662	1.6305	666	1.6185	679	1.6303	633	1.6086	583	1.615	659	1.6292	612	1.6126	686	1.6122	725	1.5864	717	1.5758
Glu	GAA	851	1.4969	833	1.5036	800	1.4898	758	1.5221	846	1.4934	772	1.5108	857	1.5115	792	1.5043	806	1.5122	841	1.4991	869	1.5153	835	1.5168	775	1.5166	790	1.5019	842	1.4996	847	1.5018	860	1.5221	788	1.501	739	1.5269	846	1.5	784	1.5048	857	1.4943	909	1.4721	913	1.4714
Glu	GAG	286	0.5031	275	0.4964	274	0.5102	238	0.4779	287	0.5066	250	0.4892	277	0.4885	261	0.4957	260	0.4878	281	0.5009	278	0.4847	266	0.4832	247	0.4834	262	0.4981	281	0.5004	281	0.4982	270	0.4779	262	0.499	229	0.4731	282	0.5	258	0.4952	290	0.5057	326	0.5279	328	0.5286
Phe	UUC	411	0.7068	409	0.7058	390	0.7269	349	0.7065	420	0.7107	365	0.7228	405	0.7001	387	0.733	389	0.7244	411	0.7105	428	0.6993	393	0.6764	369	0.7186	388	0.7314	401	0.7206	411	0.7111	407	0.6846	389	0.7312	343	0.6993	397	0.7108	380	0.7407	423	0.7121	450	0.7177	450	0.7081
Phe	UUU	752	1.2932	750	1.2942	683	1.2731	639	1.2935	762	1.2893	645	1.2772	752	1.2999	669	1.267	685	1.2756	746	1.2895	796	1.3007	769	1.3236	658	1.2814	673	1.2686	712	1.2794	745	1.2889	782	1.3154	675	1.2688	638	1.3007	720	1.2892	646	1.2593	765	1.2879	804	1.2823	821	1.2919
Gly	GGA	549	1.6315	543	1.6197	512	1.6139	468	1.6014	558	1.6352	482	1.612	555	1.6432	494	1.6078	504	1.6025	550	1.6369	576	1.6422	548	1.6297	485	1.6221	497	1.6084	533	1.6225	553	1.6434	566	1.655	499	1.6162	465	1.609	533	1.6201	491	1.6098	566	1.6148	637	1.5885	625	1.5615
Gly	GGC	147	0.4368	143	0.4265	139	0.4381	124	0.4243	147	0.4308	124	0.4147	139	0.4115	130	0.4231	130	0.4134	143	0.4256	140	0.3991	135	0.4015	124	0.4147	132	0.4272	141	0.4292	143	0.425	138	0.4035	132	0.4275	120	0.4152	141	0.4286	130	0.4262	147	0.4194	188	0.4688	188	0.4697
Gly	GGG	216	0.6419	213	0.6353	202	0.6367	185	0.633	216	0.633	191	0.6388	212	0.6277	197	0.6412	205	0.6518	211	0.628	223	0.6358	212	0.6305	188	0.6288	199	0.644	209	0.6362	208	0.6181	209	0.6111	196	0.6348	181	0.6263	211	0.6413	198	0.6492	228	0.6505	271	0.6758	284	0.7096
Gly	GGU	434	1.2897	442	1.3184	416	1.3113	392	1.3413	444	1.3011	399	1.3344	445	1.3175	408	1.3279	419	1.3323	440	1.3095	464	1.3229	450	1.3383	399	1.3344	408	1.3204	431	1.312	442	1.3135	455	1.3304	408	1.3215	390	1.3495	431	1.31	401	1.3148	461	1.3153	508	1.2668	504	1.2592
His	CAC	112	0.448	112	0.459	102	0.425	96	0.4211	112	0.4462	97	0.419	116	0.4668	102	0.4295	100	0.4274	110	0.4418	112	0.4489	110	0.4545	98	0.4188	101	0.4226	108	0.4444	109	0.4413	110	0.4508	101	0.4235	96	0.4183	109	0.4449	101	0.428	112	0.4401	133	0.4836	133	0.4845
His	CAU	388	1.552	376	1.541	378	1.575	360	1.5789	390	1.5538	366	1.581	381	1.5332	373	1.5705	368	1.5726	388	1.5582	387	1.5511	374	1.5455	370	1.5812	377	1.5774	378	1.5556	385	1.5587	378	1.5492	376	1.5765	363	1.5817	381	1.5551	371	1.572	397	1.5599	417	1.5164	416	1.5155
Ile	AUA	554	0.9607	540	0.949	487	0.933	458	0.9463	564	0.9641	468	0.9372	546	0.949	484	0.932	497	0.9342	539	0.939	588	0.966	573	0.9925	471	0.9351	490	0.9369	529	0.9452	543	0.9433	566	0.9604	489	0.9356	462	0.9467	523	0.9362	476	0.9285	571	0.9618	600	0.9621	606	0.9675
Ile	AUC	331	0.574	334	0.587	316	0.6054	275	0.5682	333	0.5692	293	0.5868	340	0.591	305	0.5873	316	0.594	339	0.5906	349	0.5734	312	0.5404	292	0.5797	308	0.5889	329	0.5878	339	0.5889	335	0.5684	307	0.5874	274	0.5615	331	0.5925	312	0.6086	341	0.5744	378	0.6061	376	0.6003
Ile	AUU	845	1.4653	833	1.464	763	1.4617	719	1.4855	858	1.4667	737	1.476	840	1.46	769	1.4807	783	1.4718	844	1.4704	889	1.4606	847	1.4671	748	1.4851	771	1.4742	821	1.4669	845	1.4679	867	1.4712	772	1.477	728	1.4918	822	1.4714	750	1.4629	869	1.4638	893	1.4319	897	1.4321
Lys	AAA	838	1.5154	830	1.5105	795	1.5143	732	1.514	831	1.5068	769	1.5213	829	1.5073	774	1.5015	804	1.507	820	1.5032	846	1.508	819	1.5209	763	1.5079	777	1.4986	817	1.506	830	1.505	841	1.5194	775	1.499	755	1.5314	830	1.5132	759	1.5	847	1.5085	876	1.4612	890	1.4723
Lys	AAG	268	0.4846	269	0.4895	255	0.4857	235	0.486	272	0.4932	242	0.4787	271	0.4927	257	0.4985	263	0.493	271	0.4968	276	0.492	258	0.4791	249	0.4921	260	0.5014	268	0.494	273	0.495	266	0.4806	259	0.501	231	0.4686	267	0.4868	253	0.5	276	0.4915	323	0.5388	319	0.5277
Leu	CUA	299	0.86	297	0.8559	280	0.8705	242	0.8259	308	0.8775	261	0.8647	302	0.8657	267	0.8641	287	0.8885	300	0.8608	326	0.8919	310	0.8887	257	0.8496	270	0.8635	292	0.8686	303	0.8674	311	0.8769	270	0.8645	241	0.8407	295	0.8728	272	0.8855	311	0.8724	334	0.8608	334	0.8642
Leu	CUC	122	0.3509	120	0.3458	113	0.3513	102	0.3481	121	0.3447	112	0.3711	120	0.344	115	0.3722	112	0.3467	125	0.3587	134	0.3666	119	0.3411	108	0.357	115	0.3678	122	0.3629	124	0.355	124	0.3496	115	0.3682	100	0.3488	121	0.358	110	0.3581	123	0.345	153	0.3943	151	0.3907
Leu	CUG	132	0.3797	134	0.3862	122	0.3793	120	0.4096	133	0.3789	124	0.4108	135	0.387	117	0.3786	127	0.3932	135	0.3874	137	0.3748	129	0.3698	128	0.4231	123	0.3934	134	0.3986	135	0.3865	132	0.3722	123	0.3938	119	0.4151	133	0.3935	125	0.4069	137	0.3843	172	0.4433	168	0.4347
Leu	CUU	437	1.257	440	1.268	393	1.2218	356	1.215	445	1.2678	364	1.206	436	1.2499	380	1.2298	404	1.2508	436	1.2511	459	1.2558	440	1.2613	369	1.2198	389	1.2441	411	1.2226	437	1.251	442	1.2462	388	1.2423	337	1.1756	418	1.2367	374	1.2176	452	1.2679	476	1.2268	475	1.229
Leu	UUA	658	1.8926	664	1.9135	608	1.8902	559	1.9078	665	1.8946	565	1.8719	668	1.915	575	1.8608	602	1.8638	663	1.9024	696	1.9042	674	1.9322	567	1.8744	582	1.8614	638	1.8979	664	1.9008	686	1.9342	580	1.857	549	1.9151	635	1.8787	563	1.8329	674	1.8906	727	1.8737	725	1.8758
Leu	UUG	438	1.2598	427	1.2305	414	1.287	379	1.2935	434	1.2365	385	1.2755	432	1.2384	400	1.2945	406	1.257	432	1.2396	441	1.2066	421	1.2069	386	1.276	397	1.2697	420	1.2494	433	1.2395	433	1.2209	398	1.2743	374	1.3047	426	1.2604	399	1.299	442	1.2398	466	1.201	466	1.2057
Met	AUG	478	1	473	1	437	1	393	1	481	1	411	1	475	1	422	1	429	1	477	1	502	1	460	1	408	1	423	1	458	1	478	1	487	1	422	1	379	1	455	1	413	1	483	1	529	1	533	1
Asn	AAC	190	0.3942	190	0.4013	178	0.3886	168	0.399	193	0.3983	175	0.4028	188	0.3937	184	0.4098	185	0.4017	189	0.3983	198	0.3952	191	0.4017	176	0.4023	183	0.4062	192	0.4094	190	0.3975	183	0.375	184	0.4089	167	0.3902	192	0.4103	178	0.4009	195	0.398	223	0.4339	223	0.4322
Asn	AAU	774	1.6058	757	1.5987	738	1.6114	674	1.601	776	1.6017	694	1.5972	767	1.6063	714	1.5902	736	1.5983	760	1.6017	804	1.6048	760	1.5983	699	1.5977	718	1.5938	746	1.5906	766	1.6025	793	1.625	716	1.5911	689	1.6098	744	1.5897	710	1.5991	785	1.602	805	1.5661	809	1.5678
Pro	CCA	226	1.1188	219	1.0909	197	1.0479	186	1.0674	231	1.1436	190	1.0873	222	1.1017	204	1.1027	199	1.0628	229	1.1323	238	1.1442	234	1.1715	190	1.0811	206	1.115	217	1.1015	226	1.1174	234	1.1457	206	1.112	187	1.0825	217	1.1029	194	1.0733	232	1.1221	262	1.1032	264	1.1092
Pro	CCC	186	0.9208	188	0.9365	177	0.9415	158	0.9067	184	0.9109	153	0.8755	184	0.9132	168	0.9081	177	0.9453	183	0.9048	183	0.8798	177	0.8861	158	0.899	167	0.9039	185	0.9391	184	0.9098	183	0.896	168	0.9069	155	0.8973	182	0.925	169	0.935	191	0.9238	223	0.9389	217	0.9118
Pro	CCG	86	0.4257	88	0.4384	79	0.4202	82	0.4706	84	0.4158	79	0.4521	86	0.4268	82	0.4432	83	0.4433	85	0.4203	83	0.399	79	0.3955	80	0.4552	79	0.4276	82	0.4162	86	0.4252	81	0.3966	79	0.4265	83	0.4805	81	0.4117	80	0.4426	87	0.4208	115	0.4842	116	0.4874
Pro	CCU	310	1.5347	308	1.5342	299	1.5904	271	1.5552	309	1.5297	277	1.5851	314	1.5583	286	1.5459	290	1.5487	312	1.5426	328	1.5769	309	1.5469	275	1.5647	287	1.5535	304	1.5431	313	1.5476	319	1.5618	288	1.5547	266	1.5398	307	1.5604	280	1.5491	317	1.5333	350	1.4737	355	1.4916
Gln	CAA	576	1.5319	574	1.5389	551	1.5242	503	1.5312	568	1.5289	518	1.5348	580	1.5283	536	1.5227	544	1.5411	577	1.5325	588	1.5393	576	1.5463	517	1.5456	540	1.5297	573	1.5362	580	1.5324	579	1.5378	539	1.5269	499	1.5354	568	1.531	524	1.5188	582	1.5316	614	1.4957	612	1.5018
Gln	CAG	176	0.4681	172	0.4611	172	0.4758	154	0.4688	175	0.4711	157	0.4652	179	0.4717	168	0.4773	162	0.4589	176	0.4675	176	0.4607	169	0.4537	152	0.4544	166	0.4703	173	0.4638	177	0.4676	174	0.4622	167	0.4731	151	0.4646	174	0.469	166	0.4812	178	0.4684	207	0.5043	203	0.4982
Arg	AGA	363	1.8631	362	1.8564	347	1.8589	312	1.8192	361	1.8545	328	1.8743	366	1.8642	336	1.8361	345	1.8565	366	1.8769	376	1.8942	362	1.8789	324	1.8497	343	1.8524	363	1.8825	367	1.8853	369	1.8763	342	1.8503	309	1.8	362	1.8708	339	1.8729	378	1.8651	423	1.8168	417	1.7846
Arg	AGG	125	0.6416	124	0.6359	124	0.6643	112	0.6531	124	0.637	108	0.6171	131	0.6672	119	0.6503	119	0.6404	129	0.6615	118	0.5945	116	0.6021	114	0.6508	116	0.6265	120	0.6223	125	0.6421	120	0.6102	116	0.6276	112	0.6524	122	0.6305	113	0.6243	130	0.6414	169	0.7258	178	0.7618
Arg	CGA	257	1.3191	262	1.3436	249	1.3339	233	1.3586	261	1.3408	238	1.36	259	1.3192	247	1.3497	254	1.3668	255	1.3077	263	1.3249	256	1.3287	235	1.3416	250	1.3501	256	1.3276	257	1.3202	259	1.3169	250	1.3526	235	1.3689	255	1.3178	243	1.3425	265	1.3076	296	1.2713	298	1.2753
Arg	CGC	68	0.349	67	0.3436	63	0.3375	55	0.3207	64	0.3288	55	0.3143	62	0.3158	64	0.3497	63	0.339	66	0.3385	70	0.3526	66	0.3426	56	0.3197	63	0.3402	64	0.3319	66	0.339	69	0.3508	63	0.3408	55	0.3204	68	0.3514	61	0.337	70	0.3454	82	0.3522	79	0.3381
Arg	CGG	81	0.4157	78	0.4	75	0.4018	66	0.3848	79	0.4058	68	0.3886	78	0.3973	72	0.3934	71	0.3821	79	0.4051	81	0.4081	78	0.4048	69	0.3939	76	0.4104	80	0.4149	78	0.4007	83	0.422	75	0.4058	65	0.3786	80	0.4134	72	0.3978	85	0.4194	113	0.4853	112	0.4793
Arg	CGU	275	1.4115	277	1.4205	262	1.4036	251	1.4636	279	1.4332	253	1.4457	282	1.4363	260	1.4208	263	1.4152	275	1.4103	283	1.4257	278	1.4429	253	1.4443	263	1.4203	274	1.4209	275	1.4127	280	1.4237	263	1.4229	254	1.4796	274	1.416	258	1.4254	288	1.4211	314	1.3486	318	1.3609
Ser	AGC	84	0.3275	83	0.3294	83	0.3444	69	0.3146	85	0.3282	75	0.3319	83	0.3223	84	0.3608	80	0.338	87	0.3385	92	0.3435	78	0.313	75	0.3328	82	0.3467	85	0.3405	85	0.3316	84	0.3241	82	0.3462	69	0.3255	83	0.3327	80	0.3468	88	0.3312	128	0.4312	124	0.4189
Ser	AGU	325	1.2671	316	1.254	301	1.249	275	1.2538	325	1.2548	278	1.2301	321	1.2466	290	1.2455	291	1.2296	322	1.2529	332	1.2396	292	1.1719	277	1.2293	295	1.2474	309	1.2377	323	1.2601	327	1.2617	297	1.254	272	1.283	307	1.2305	284	1.2312	336	1.2647	368	1.2398	370	1.25
Ser	UCA	311	1.2125	304	1.2063	269	1.1162	258	1.1763	317	1.2239	265	1.1726	311	1.2078	272	1.1682	281	1.1873	306	1.1907	328	1.2246	310	1.2441	265	1.176	274	1.1586	298	1.1936	306	1.1938	307	1.1846	275	1.1612	249	1.1745	304	1.2184	266	1.1532	318	1.197	333	1.1218	340	1.1486
Ser	UCC	247	0.963	243	0.9643	236	0.9793	216	0.9848	247	0.9537	219	0.969	248	0.9631	225	0.9664	226	0.9549	249	0.9689	257	0.9596	243	0.9753	225	0.9985	225	0.9514	246	0.9853	251	0.9792	249	0.9608	224	0.9458	213	1.0047	240	0.9619	224	0.9711	254	0.9561	281	0.9467	277	0.9358
Ser	UCG	123	0.4795	129	0.5119	117	0.4855	106	0.4833	123	0.4749	112	0.4956	125	0.4854	111	0.4767	119	0.5028	129	0.5019	123	0.4592	119	0.4776	110	0.4882	119	0.5032	122	0.4887	127	0.4954	126	0.4862	120	0.5067	101	0.4764	122	0.489	117	0.5072	125	0.4705	167	0.5626	159	0.5372
Ser	UCU	449	1.7505	437	1.7341	440	1.8257	392	1.7872	457	1.7645	407	1.8009	457	1.7748	415	1.7824	423	1.7873	449	1.7471	475	1.7735	453	1.8181	400	1.7751	424	1.7928	438	1.7543	446	1.7399	462	1.7826	423	1.7861	368	1.7358	441	1.7675	413	1.7905	473	1.7804	504	1.6979	506	1.7095
Thr	ACA	316	1.2441	306	1.2228	278	1.1893	259	1.2131	316	1.2453	264	1.1905	313	1.2445	265	1.1648	281	1.2204	312	1.2381	325	1.2393	313	1.2558	261	1.1904	266	1.1654	295	1.2165	311	1.2317	317	1.2444	267	1.1685	256	1.2162	300	1.2158	266	1.1849	322	1.2481	341	1.2007	341	1.2028
Thr	ACC	176	0.6929	173	0.6913	170	0.7273	152	0.7119	173	0.6818	157	0.708	172	0.6839	159	0.6989	161	0.6992	176	0.6984	181	0.6902	170	0.682	155	0.707	160	0.701	168	0.6928	177	0.701	176	0.6909	160	0.7002	147	0.6983	169	0.6849	160	0.7127	185	0.7171	212	0.7465	214	0.7549
Thr	ACG	109	0.4291	107	0.4276	101	0.4321	91	0.4262	107	0.4217	101	0.4555	108	0.4294	106	0.4659	98	0.4256	108	0.4286	110	0.4194	101	0.4052	98	0.447	106	0.4644	109	0.4495	108	0.4277	102	0.4004	106	0.4639	91	0.4323	111	0.4498	100	0.4454	108	0.4186	136	0.4789	136	0.4797
Thr	ACU	415	1.6339	415	1.6583	386	1.6513	352	1.6487	419	1.6512	365	1.646	413	1.6421	380	1.6703	381	1.6547	412	1.6349	433	1.6511	413	1.657	363	1.6556	381	1.6692	398	1.6412	414	1.6396	424	1.6644	381	1.6674	348	1.6532	407	1.6494	372	1.657	417	1.6163	447	1.5739	443	1.5626
Val	GUA	398	1.4579	385	1.409	361	1.4354	353	1.4754	396	1.4439	352	1.4621	389	1.4288	365	1.4644	363	1.4362	388	1.4291	412	1.4662	388	1.4464	354	1.4719	365	1.46	384	1.4369	389	1.4288	402	1.4658	365	1.4585	341	1.4557	385	1.4379	356	1.459	405	1.4516	428	1.4033	436	1.4295
Val	GUC	132	0.4835	137	0.5014	124	0.493	110	0.4598	133	0.485	112	0.4652	132	0.4848	120	0.4814	123	0.4866	134	0.4936	126	0.4484	125	0.466	115	0.4782	119	0.476	128	0.479	134	0.4922	125	0.4558	119	0.4755	110	0.4696	136	0.5079	119	0.4877	138	0.4946	152	0.4984	149	0.4885
Val	GUG	167	0.6117	174	0.6368	160	0.6362	152	0.6353	172	0.6272	157	0.6521	174	0.6391	162	0.6499	163	0.6449	171	0.6298	180	0.6406	174	0.6486	159	0.6611	167	0.668	172	0.6436	172	0.6318	175	0.6381	167	0.6673	150	0.6403	168	0.6275	155	0.6352	176	0.6308	211	0.6918	207	0.6787
Val	GUU	395	1.4469	397	1.4529	361	1.4354	342	1.4295	396	1.4439	342	1.4206	394	1.4472	350	1.4042	362	1.4322	393	1.4475	406	1.4448	386	1.439	334	1.3888	349	1.396	385	1.4406	394	1.4472	395	1.4403	350	1.3986	336	1.4344	382	1.4267	346	1.418	397	1.4229	429	1.4066	428	1.4033
Trp	UGG	378	1	377	1	356	1	323	1	380	1	330	1	377	1	344	1	343	1	376	1	385	1	372	1	330	1	343	1	364	1	378	1	376	1	343	1	322	1	363	1	333	1	382	1	416	1	415	1
Tyr	UAC	149	0.3973	148	0.3936	140	0.41	125	0.4058	146	0.3842	127	0.3994	150	0.4005	132	0.3888	141	0.4099	145	0.3919	150	0.3774	139	0.3762	133	0.4086	137	0.4023	145	0.405	147	0.393	144	0.3745	136	0.4012	126	0.3956	146	0.4067	134	0.4098	150	0.3916	178	0.4373	174	0.4208
Tyr	UAU	601	1.6027	604	1.6064	543	1.59	491	1.5942	614	1.6158	509	1.6006	599	1.5995	547	1.6112	547	1.5901	595	1.6081	645	1.6226	600	1.6238	518	1.5914	544	1.5977	571	1.595	601	1.607	625	1.6255	542	1.5988	511	1.6044	572	1.5933	520	1.5902	616	1.6084	636	1.5627	653	1.5792
*indicates stop codon.
[truncated: 8 more columns]
