# Supplementary material for: The Complete Chloroplast Genomes of Bulbophyllum (Orchidaceae) Species: Insight into Genome Structure Divergence and Phylogenetic Analysis
Source: Int J Mol Sci. 2024 Feb 25;25(5):2665. doi: 10.3390/ijms25052665 (PMC10932260; doi:10.3390/ijms25052665)
Supplement: Supplementary file 1 [file ijms-25-02665-s001.zip › Supplementary Table S7.xlsx]

## Sheet: Sheet1
Supplementary Table S7 Nucleotide diversity among 28 Bulbophyllum chloroplast genomes.
Window	Midpoint	Nucleotide diversity
1-256	206	0.01402
182-281	231	0.00616
207-306	256	0.00336
232-331	281	0.00071
257-356	306	0.00376
282-381	331	0.00513
307-406	356	0.00722
332-431	381	0.00931
357-456	406	0.00627
382-481	431	0.00698
407-506	456	0.00627
432-531	481	0.00672
457-556	506	0.01079
482-581	531	0.00942
507-606	556	0.01074
532-631	581	0.01098
557-656	606	0.0069
582-681	631	0.00619
607-706	656	0.00421
632-731	681	0.00325
657-756	706	0.00325
682-781	731	0.00325
707-806	756	0.00325
732-831	781	0.00574
757-856	806	0.00646
782-881	831	0.00646
807-906	856	0.01106
832-931	881	0.00675
857-956	906	0.00603
882-981	931	0.00812
907-1006	956	0.00585
932-1031	981	0.00817
957-1056	1006	0.00955
982-1081	1031	0.01413
1007-1106	1056	0.01362
1032-1131	1081	0.01058
1057-1156	1106	0.00992
1082-1181	1131	0.00325
1107-1206	1156	0.00071
1132-1231	1181	0.00143
1157-1256	1206	0.00286
1182-1281	1231	0.00286
1207-1329	1256	0.01421
1232-1354	1281	0.02675
1257-1381	1329	0.02603
1282-1414	1354	0.0331
1330-1522	1381	0.03135
1355-1547	1414	0.01947
1382-1572	1522	0.0209
1415-1597	1547	0.02225
1523-1622	1572	0.01873
1548-1647	1597	0.01735
1573-1708	1622	0.02463
1598-1734	1647	0.02386
1623-1759	1708	0.02762
1648-1785	1734	0.02971
1709-1866	1759	0.03151
1735-1891	1785	0.02844
1760-1916	1866	0.02058
1786-1944	1891	0.02981
1867-1969	1916	0.02265
1892-1994	1944	0.02204
1920-2019	1969	0.02204
1945-2044	1994	0.01286
1970-2069	2019	0.0081
1995-2094	2044	0.00484
2020-2119	2069	0.00661
2045-2144	2094	0.0145
2070-2169	2119	0.01659
2095-2194	2144	0.02312
2120-2219	2169	0.02074
2145-2244	2194	0.01677
2170-2269	2219	0.02135
2195-2294	2244	0.0187
2220-2319	2269	0.03003
2245-2344	2294	0.02738
2270-2369	2319	0.03119
2295-2394	2344	0.03394
2320-2419	2369	0.03019
2345-2444	2394	0.0282
2370-2469	2419	0.02114
2395-2494	2444	0.01841
2420-2519	2469	0.01415
2445-2544	2494	0.01648
2470-2569	2519	0.02421
2495-2594	2544	0.02505
2520-2619	2569	0.02915
2545-2644	2594	0.0254
2570-2669	2619	0.01772
2595-2694	2644	0.01757
2620-2719	2669	0.01365
2645-2744	2694	0.01775
2670-2769	2719	0.02124
2695-2794	2744	0.0287
2720-2819	2769	0.03077
2745-2844	2794	0.03146
2770-2869	2819	0.02786
2795-2894	2844	0.01844
2820-2919	2869	0.01487
2845-2944	2894	0.01667
2870-2969	2919	0.01799
2895-2994	2944	0.01738
2920-3019	2969	0.02159
2945-3044	2994	0.02151
2970-3069	3019	0.02251
2995-3094	3044	0.02505
3020-3140	3069	0.0259
3045-3174	3094	0.02722
3070-3199	3140	0.02669
3116-3224	3174	0.02426
3141-3249	3199	0.01995
3175-3274	3224	0.01873
3200-3299	3249	0.01556
3225-3324	3274	0.01992
3250-3349	3299	0.01653
3275-3374	3324	0.02323
3300-3399	3349	0.025
3325-3424	3374	0.02127
3350-3449	3399	0.02876
3375-3474	3424	0.01616
3400-3862	3449	0.03021
3425-3927	3474	0.0372
3450-3952	3862	0.03185
3475-3977	3927	0.03455
3872-4005	3952	0.0196
3928-4205	3977	0.01603
3953-4230	4005	0.01389
3978-4255	4205	0.01328
4006-4286	4230	0.01312
4206-4311	4255	0.00836
4231-4336	4286	0.01034
4256-4366	4311	0.0131
4287-4391	4336	0.01672
4312-4416	4366	0.01833
4337-4441	4391	0.02275
4367-4466	4416	0.01934
4392-4638	4441	0.01585
4417-4663	4466	0.01209
4442-4688	4638	0.00918
4613-4717	4663	0.01222
4639-4742	4688	0.01402
4664-4767	4717	0.01791
4689-4874	4742	0.01579
4718-4907	4767	0.02
4743-4950	4874	0.02899
4768-4976	4907	0.04069
4875-5001	4950	0.0428
4908-5042	4976	0.0409
4951-5070	5001	0.04603
4977-5095	5042	0.03442
5002-5492	5070	0.03754
5045-5517	5095	0.03286
5071-5542	5492	0.01608
5096-5567	5517	0.01495
5493-5592	5542	0.00905
5518-5617	5567	0.00767
5543-5642	5592	0.01325
5568-5667	5617	0.01042
5593-5692	5642	0.01175
5618-5717	5667	0.01429
5643-5742	5692	0.0118
5668-5776	5717	0.0164
5693-5873	5742	0.02132
5718-5898	5776	0.02468
5743-5926	5873	0.02384
5777-5951	5898	0.02392
5874-5976	5926	0.01696
5899-6009	5951	0.02019
5927-6036	5976	0.01849
5952-6071	6009	0.02111
5977-6100	6036	0.02111
6010-6125	6071	0.01127
6037-6150	6100	0.01198
6072-6175	6125	0.00844
6101-6200	6150	0.01098
6126-6225	6175	0.01098
6151-6268	6200	0.02032
6176-6487	6225	0.02677
6201-6512	6268	0.03585
6226-6537	6487	0.03722
6269-6567	6512	0.02672
6488-6649	6537	0.025
6513-6674	6567	0.03294
6538-6699	6649	0.03503
6568-6724	6674	0.03579
6650-6750	6699	0.03593
6675-6775	6724	0.01566
6700-6800	6750	0.01148
6725-6828	6775	0.01204
6751-6853	6800	0.01198
6776-7950	6828	0.01548
6801-8213	6853	0.03013
6829-8238	7950	0.03079
6854-8263	8213	0.02503
7951-8288	8238	0.02296
8214-8313	8263	0.01378
8239-8373	8288	0.01905
8264-8398	8313	0.02053
8289-8427	8373	0.02683
8314-8453	8398	0.02884
8374-8478	8427	0.02783
8399-8509	8453	0.02807
8428-8543	8478	0.02458
8454-8570	8509	0.0263
8479-8597	8543	0.02656
8510-8622	8570	0.0359
8544-8647	8597	0.03516
8571-8680	8622	0.03003
8598-8705	8647	0.02143
8623-8730	8680	0.01026
8648-8755	8705	0.0113
8681-8780	8730	0.01135
8706-8805	8755	0.01608
8731-8830	8780	0.0241
8756-8855	8805	0.02156
8781-8880	8830	0.01743
8806-9182	8855	0.01759
8831-9207	8880	0.0131
8856-9246	9182	0.01738
8881-9312	9207	0.03222
9183-9350	9246	0.03201
9208-9384	9312	0.03209
9247-9415	9350	0.02995
9313-9440	9384	0.01653
9351-9465	9415	0.01257
9385-9490	9440	0.00765
9416-9515	9465	0.00352
9441-9540	9490	0.0028
9466-9575	9515	0.02463
9491-9651	9540	0.04304
9516-9679	9575	0.0541
9541-9704	9651	0.06529
9607-9735	9679	0.05952
9652-9760	9704	0.04045
9680-9785	9735	0.03082
9705-9810	9760	0.02344
9736-9836	9785	0.0154
9761-9876	9810	0.02209
9786-9901	9836	0.02963
9811-9992	9876	0.04037
9837-10021	9901	0.03976
9877-10046	9992	0.03754
9902-10979	10021	0.03
9993-11006	10046	0.03362
10022-11031	10979	0.03788
10047-11061	11006	0.03886
10980-11086	11031	0.04156
11007-11111	11061	0.02267
11032-11136	11086	0.01101
11062-11173	11111	0.00989
11087-11198	11136	0.00648
11112-11226	11173	0.01415
11137-11251	11198	0.01648
11174-11280	11226	0.01286
11199-11307	11251	0.02262
11227-11332	11280	0.01495
11252-11357	11307	0.01876
11281-11383	11332	0.02246
11308-11408	11357	0.01468
11333-11440	11383	0.01611
11358-11474	11408	0.01532
11384-11499	11440	0.01394
11409-11524	11474	0.02381
11441-11549	11499	0.0231
11475-11574	11524	0.02481
11500-11599	11549	0.02177
11525-11625	11574	0.01201
11550-11650	11599	0.01201
11575-11675	11625	0.01307
11600-11701	11650	0.01235
11626-11727	11675	0.02217
11651-11752	11701	0.02399
11676-11777	11727	0.01659
11702-11802	11752	0.0173
11728-11827	11777	0.0082
11753-11852	11802	0.00566
11778-11877	11827	0.00423
11803-12035	11852	0.01474
11828-12066	11877	0.01122
11853-12091	12035	0.01392
11878-12120	12066	0.01392
12042-12169	12091	0.01196
12067-12334	12120	0.02151
12092-12359	12169	0.0241
12121-12384	12334	0.03066
12170-12409	12359	0.03392
12335-12434	12384	0.02508
12360-12459	12409	0.02304
12385-12484	12434	0.02786
12410-12509	12459	0.01606
12435-12534	12484	0.01788
12460-12559	12509	0.01606
12485-12584	12534	0.01077
12510-12609	12559	0.01402
12535-12634	12584	0.0122
12560-12659	12609	0.01331
12585-12684	12634	0.00865
12610-12709	12659	0.00468
12635-12734	12684	0.00397
12660-12759	12709	0.00357
12685-12784	12734	0.00214
12710-12809	12759	0.005
12735-12834	12784	0.00709
12760-12859	12809	0.00566
12785-12884	12834	0.00566
12810-12909	12859	0.00854
12835-12934	12884	0.00646
12860-12959	12909	0.00646
12885-12984	12934	0.00646
12910-13009	12959	0.00071
12935-13034	12984	0.00071
12960-13059	13009	0
12985-13084	13034	0.0027
13010-13109	13059	0.00413
13035-13134	13084	0.00738
13060-13159	13109	0.00937
13085-13184	13134	0.00667
13110-13209	13159	0.00738
13135-13234	13184	0.00881
13160-13259	13209	0.00754
13185-13284	13234	0.00754
13210-13309	13259	0.00794
13235-13334	13284	0.00325
13260-13359	13309	0.00468
13285-13384	13334	0.0054
13310-13409	13359	0.01034
13335-13434	13384	0.01106
13360-13459	13409	0.01034
13385-13484	13434	0.01466
13410-13509	13459	0.0086
13435-13534	13484	0.0086
13460-13559	13509	0.00788
13485-13584	13534	0.00733
13510-13609	13559	0.0059
13535-13634	13584	0.00519
13560-13659	13609	0.00447
13585-13684	13634	0.00071
13610-13709	13659	0.00071
13635-13734	13684	0.00214
13660-13759	13709	0.00844
13685-13784	13734	0.01352
13710-13809	13759	0.01352
13735-13834	13784	0.01677
13760-13859	13809	0.01185
13785-13892	13834	0.00955
13810-13917	13859	0.00955
13835-13942	13892	0.0063
13860-13967	13917	0.01087
13893-13992	13942	0.00738
13918-14017	13967	0.00881
13943-14042	13992	0.00952
13968-14067	14017	0.00429
13993-14092	14042	0.00698
14018-14117	14067	0.00556
14043-14142	14092	0.00341
14068-14167	14117	0.00624
14093-14192	14142	0.00918
14118-14217	14167	0.01381
14143-14242	14192	0.01651
14168-14267	14217	0.01368
14193-14292	14242	0.00804
14218-14317	14267	0.0054
14243-14342	14292	0.00341
14268-14367	14317	0.00556
14293-14392	14342	0.0081
14318-14417	14367	0.00611
14343-14456	14392	0.00683
14368-14483	14417	0.00606
14393-14508	14456	0.00606
14418-14533	14483	0.01124
14457-14567	14508	0.01124
14484-14592	14533	0.01185
14509-14617	14567	0.00931
14534-14795	14592	0.01394
14568-14820	14617	0.01532
14593-14846	14795	0.01333
14618-14877	14820	0.02
14796-14902	14846	0.01656
14821-14927	14877	0.01981
14847-14977	14902	0.02394
14878-15002	14927	0.02053
14903-15027	14977	0.02087
14928-15052	15002	0.01696
14978-15077	15027	0.01481
15003-15102	15052	0.01365
15028-15127	15077	0.00836
15053-15154	15102	0.01272
15078-15179	15127	0.01201
15103-15235	15154	0.01791
15128-15260	15179	0.01929
15155-15285	15235	0.01415
15180-15310	15260	0.01217
15236-15335	15285	0.00616
15261-15360	15310	0.00407
15286-15385	15335	0.0027
15311-15416	15360	0.00876
15336-15441	15385	0.01101
15361-15467	15416	0.0163
15386-15512	15441	0.01899
15417-15588	15467	0.03032
15442-15613	15512	0.02889
15468-15638	15588	0.02288
15513-15663	15613	0.02228
15589-15688	15638	0.00627
15614-15713	15663	0.00418
15639-15738	15688	0.00418
15664-15763	15713	0.00209
15689-15788	15738	0.00505
15714-15813	15763	0.00434
15739-15838	15788	0.00505
15764-15869	15813	0.00577
15789-15894	15838	0.00214
15814-15927	15869	0.00836
15839-16222	15894	0.02437
15870-16247	15927	0.03114
15895-16274	16222	0.03397
15940-16314	16247	0.03132
16223-16339	16274	0.02243
16248-16364	16314	0.01913
16275-16389	16339	0.02963
16315-16423	16364	0.03471
16340-16466	16389	0.03392
16365-16513	16423	0.03386
16390-16544	16466	0.03161
16424-16586	16513	0.0305
16467-16616	16544	0.02696
16514-16645	16586	0.03241
16545-16675	16616	0.02487
16587-16700	16645	0.01733
16617-16725	16675	0.01526
16646-16750	16700	0.00569
16676-16775	16725	0.00214
16701-16800	16750	0.00214
16726-16825	16775	0.00209
16751-16850	16800	0.0028
16776-16875	16825	0.0028
16801-16900	16850	0.0028
16826-16925	16875	0.00214
16851-16950	16900	0.00577
16876-16975	16925	0.01
16901-17000	16950	0.01071
16926-17025	16975	0.01
16951-17050	17000	0.00638
16976-17075	17025	0.00397
17001-17100	17050	0.00397
17026-17125	17075	0.00651
17051-17150	17100	0.00579
17076-17175	17125	0.00667
17101-17200	17150	0.00738
17126-17225	17175	0.01132
17151-17250	17200	0.01341
17176-17275	17225	0.01071
17201-17300	17250	0.01265
17226-17325	17275	0.00892
17251-17350	17300	0.00937
17276-17375	17325	0.00865
17301-17400	17350	0.01143
17326-17425	17375	0.00868
17351-17450	17400	0.01344
17376-17479	17425	0.01553
17401-17504	17450	0.01513
17426-17531	17479	0.01656
17451-17557	17504	0.02262
17480-17607	17531	0.02677
17505-17632	17557	0.0305
17532-17665	17607	0.03608
17558-17690	17632	0.03278
17608-17771	17665	0.02796
17633-17796	17690	0.02479
17666-17821	17771	0.01915
17691-17846	17796	0.01556
17772-17871	17821	0.01413
17797-17896	17846	0.00783
17822-17921	17871	0.00646
17847-17946	17896	0.00468
17872-17971	17921	0.00794
17897-17996	17946	0.00931
17922-18021	17971	0.01328
17947-18046	17996	0.01553
17972-18071	18021	0.0137
17997-18096	18046	0.02976
18022-18121	18071	0.02955
18047-18146	18096	0.02333
18072-18171	18121	0.02399
18097-18196	18146	0.00656
18122-18221	18171	0.0028
18147-18246	18196	0.00352
18172-18271	18221	0.00357
18197-18296	18246	0.00429
18222-18321	18271	0.00627
18247-18346	18296	0.00484
18272-18371	18321	0.00646
18297-18396	18346	0.00772
18322-18421	18371	0.00574
18347-18446	18396	0.00574
18372-18471	18421	0.0027
18397-18506	18446	0.0059
18422-18533	18471	0.00852
18447-18558	18506	0.00852
18472-18588	18533	0.01675
18507-18636	18558	0.01513
18534-18700	18588	0.0264
18559-18725	18636	0.03093
18589-18752	18700	0.03204
18637-18777	18725	0.03492
18701-18802	18752	0.02659
18726-18827	18777	0.03005
18753-18852	18802	0.02392
18778-18877	18827	0.02418
18803-18902	18852	0.01934
18828-18927	18877	0.01415
18853-18952	18902	0.01167
18878-18977	18927	0.00709
18903-19002	18952	0.00638
18928-19027	18977	0.00429
18953-19052	19002	0.005
18978-19077	19027	0.00357
19003-19102	19052	0.00698
19028-19127	19077	0.01156
19053-19152	19102	0.00942
19078-19177	19127	0.01079
19103-19202	19152	0.00738
19128-19227	19177	0.0028
19153-19252	19202	0.0028
19178-19277	19227	0.00352
19203-19302	19252	0.00423
19228-19327	19277	0.00489
19253-19352	19302	0.00632
19278-19377	19327	0.00817
19303-19402	19352	0.01087
19328-19427	19377	0.01296
19353-19452	19402	0.01153
19378-19477	19427	0.00958
19403-19502	19452	0.00754
19428-19527	19477	0.0055
19453-19552	19502	0.0055
19478-19577	19527	0.00812
19503-19602	19552	0.01177
19528-19627	19577	0.01812
19553-19652	19602	0.01812
19578-19677	19627	0.02026
19603-19702	19652	0.01722
19628-19727	19677	0.01016
19653-19752	19702	0.01302
19678-19777	19727	0.00693
19703-19802	19752	0.00638
19728-19827	19777	0.00709
19753-19852	19802	0.0087
19778-19877	19827	0.00804
19803-19902	19852	0.00661
19828-19927	19877	0.00788
19853-19958	19902	0.00738
19878-19983	19927	0.01304
19903-20008	19958	0.02233
19928-20039	19983	0.02233
19959-20064	20008	0.01907
19984-20089	20039	0.02085
20009-20114	20064	0.01437
20040-20139	20089	0.01608
20065-20164	20114	0.02254
20090-20189	20139	0.01989
20115-20223	20164	0.02423
20140-20248	20189	0.02587
20165-20273	20223	0.02291
20199-20298	20248	0.02148
20224-20323	20273	0.01704
20249-20348	20298	0.01368
20274-20373	20323	0.0109
20299-20398	20348	0.0082
20324-20423	20373	0.00693
20349-20448	20398	0.00423
20374-20473	20423	0.00606
20399-20498	20448	0.0054
20424-20523	20473	0.01101
20449-20548	20498	0.01519
20474-20573	20523	0.01193
20499-20598	20548	0.01635
20524-20623	20573	0.01394
20549-20648	20598	0.01317
20574-20673	20623	0.02304
20599-20698	20648	0.02563
20624-20723	20673	0.02452
20649-20748	20698	0.02254
20674-20773	20723	0.01476
20699-20798	20748	0.01661
20724-20823	20773	0.0177
20749-20848	20798	0.02159
20774-20873	20823	0.02159
20799-20898	20848	0.01831
20824-20923	20873	0.01569
20849-20948	20898	0.01235
20874-20973	20923	0.01444
20899-20998	20948	0.01013
20924-21023	20973	0.01381
20949-21048	20998	0.01325
20974-21073	21023	0.0137
20999-21098	21048	0.01172
21024-21123	21073	0.0082
21049-21148	21098	0.01389
21074-21179	21123	0.01368
21099-21204	21148	0.01907
21124-21247	21179	0.0214
21149-21272	21204	0.01754
21180-21297	21247	0.0209
21205-21322	21272	0.02169
21248-21362	21297	0.0218
21273-21387	21322	0.02206
21298-21427	21362	0.02095
21323-21452	21387	0.01548
21363-21477	21427	0.01228
21388-21502	21452	0.01421
21428-21527	21477	0.00825
21453-21552	21502	0.00897
21478-21577	21527	0.01312
21503-21602	21552	0.01159
21528-21627	21577	0.0123
21553-21652	21602	0.01159
21578-21677	21627	0.01196
21603-21702	21652	0.00876
21628-21727	21677	0.00733
21653-21752	21702	0.00661
21678-21777	21727	0.00143
21703-21802	21752	0.0059
21728-21827	21777	0.00733
21753-21852	21802	0.00733
21778-21877	21827	0.00733
21803-21902	21852	0.00214
21828-21927	21877	0.00413
21853-21952	21902	0.00616
21878-21977	21927	0.00616
21903-22002	21952	0.00616
21928-22027	21977	0.00418
21953-22052	22002	0.00286
21978-22077	22027	0.00357
22003-22102	22052	0.00852
22028-22127	22077	0.01561
22053-22152	22102	0.01632
22078-22177	22127	0.01489
22103-22202	22152	0.01209
22128-22227	22177	0.00754
22153-22252	22202	0.01135
22178-22277	22227	0.01545
22203-22302	22252	0.01402
22228-22327	22277	0.01077
22253-22352	22302	0.00553
22278-22377	22327	0.00563
22303-22402	22352	0.00635
22328-22427	22377	0.00635
22353-22452	22402	0.00635
22378-22477	22427	0.00214
22403-22502	22452	0.00071
22428-22527	22477	0
22453-22552	22502	0.00071
22478-22577	22527	0.00341
22503-22602	22552	0.00413
22528-22627	22577	0.00413
22553-22652	22602	0.00413
22578-22677	22627	0.00214
22603-22702	22652	0.00283
22628-22727	22677	0.00283
22653-22752	22702	0.00672
22678-22777	22727	0.00601
22703-22802	22752	0.0104
22728-22827	22777	0.01452
22753-22852	22802	0.01201
22778-22877	22827	0.01201
22803-22902	22852	0.00825
22828-22927	22877	0.01188
22853-22952	22902	0.01259
22878-22977	22927	0.01794
22903-23002	22952	0.01937
22928-23027	22977	0.01685
22953-23052	23002	0.01685
22978-23084	23027	0.02034
23003-23109	23052	0.02775
23028-23134	23084	0.03458
23053-23159	23109	0.04161
23085-23184	23134	0.03278
23110-23209	23159	0.02262
23135-23234	23184	0.01381
23160-23265	23209	0.00611
23185-23290	23234	0.00873
23210-23315	23265	0.01071
23235-23340	23290	0.00817
23266-23365	23315	0.00675
23291-23390	23340	0.00484
23316-23415	23365	0.00778
23341-23440	23390	0.00849
23366-23465	23415	0.01175
23391-23499	23440	0.01979
23416-23524	23465	0.01701
23441-23549	23499	0.01558
23466-23574	23524	0.01669
23500-23599	23549	0.01048
23525-23624	23574	0.00971
23550-23649	23599	0.00971
23575-23674	23624	0.00463
23600-23699	23649	0.00347
23625-23724	23674	0.00209
23650-23749	23699	0.00585
23675-23774	23724	0.00656
23700-23799	23749	0.00661
23725-23824	23774	0.00788
23750-23849	23799	0.00413
23775-23874	23824	0.00622
23800-23899	23849	0.00479
23825-23924	23874	0.00743
23850-23949	23899	0.01005
23875-23974	23924	0.01066
23900-23999	23949	0.01066
23925-24024	23974	0.00603
23950-24049	23999	0.00889
23975-24074	24024	0.00923
24000-24099	24049	0.01132
24025-24124	24074	0.01275
24050-24149	24099	0.0087
24075-24174	24124	0.00704
24100-24199	24149	0.00704
24125-24224	24174	0.00561
24150-24249	24199	0.00489
24175-24274	24224	0.0028
24200-24299	24249	0.00418
24225-24324	24274	0.00556
24250-24349	24299	0.00926
24275-24374	24324	0.00926
24300-24399	24349	0.00833
24325-24424	24374	0.00767
24350-24449	24399	0.00524
24375-24474	24424	0.00595
24400-24499	24449	0.0055
24425-24524	24474	0.00804
24450-24549	24499	0.0082
24475-24574	24524	0.00749
24500-24599	24549	0.00611
24525-24624	24574	0.00286
24550-24649	24599	0.00071
24575-24674	24624	0.00214
24600-24699	24649	0.00447
24625-24724	24674	0.00519
24650-24749	24699	0.01013
24675-24774	24724	0.01013
24700-24799	24749	0.00918
24725-24824	24774	0.01172
24750-24849	24799	0.00958
24775-24879	24824	0.01339
24800-24915	24849	0.0113
24825-24955	24879	0.01399
24850-25001	24915	0.01886
24891-25026	24955	0.01505
24916-25077	25001	0.01923
24956-25102	25026	0.02272
25002-25129	25077	0.0214
25027-25154	25102	0.03148
25078-25179	25129	0.02802
25103-25204	25154	0.01857
25130-25234	25179	0.01222
25155-25259	25204	0.00526
25180-25352	25234	0.01624
25210-25384	25259	0.01894
25235-25409	25352	0.02037
25260-25440	25384	0.0172
25353-25465	25409	0.01032
25385-25490	25440	0.00762
25410-25515	25465	0.00995
25441-25540	25490	0.00995
25466-25565	25515	0.00913
25491-25590	25540	0.01053
25516-25615	25565	0.00677
25541-25640	25590	0.0054
25566-25665	25615	0.00283
25591-25690	25640	0.00495
25616-25715	25665	0.00884
25641-25740	25690	0.00884
25666-25765	25715	0.00812
25691-25790	25740	0.00765
25716-25815	25765	0.00447
25741-25840	25790	0.00519
25766-25865	25815	0.00447
25791-25890	25840	0.00143
25816-25915	25865	0.00397
25841-25940	25890	0.00468
25866-25965	25915	0.00937
25891-25990	25940	0.01241
25916-26015	25965	0.00987
25941-26040	25990	0.01405
25966-26065	26015	0.01272
25991-26090	26040	0.0104
26016-26115	26065	0.00968
26041-26140	26090	0.00407
26066-26165	26115	0.00143
26091-26190	26140	0.00143
26116-26215	26165	0.00143
26141-26240	26190	0.00214
26166-26265	26215	0.00143
26191-26290	26240	0.00071
26216-26315	26265	0.0027
26241-26340	26290	0.00683
26266-26365	26315	0.01024
26291-26390	26340	0.01222
26316-26415	26365	0.01161
26341-26440	26390	0.00931
26366-26465	26415	0.00661
26391-26490	26440	0.00534
26416-26515	26465	0.00606
26441-26540	26490	0.00423
26466-26565	26515	0.00656
26491-26590	26540	0.00585
26516-26615	26565	0.01082
26541-26640	26590	0.01153
26566-26665	26615	0.01241
26591-26690	26640	0.01378
26616-26715	26665	0.01048
26641-26740	26690	0.01048
26666-26765	26715	0.00799
26691-26790	26740	0.01058
26716-26815	26765	0.0113
26741-26840	26790	0.01058
26766-26871	26815	0.01897
26791-26896	26840	0.02373
26816-26921	26871	0.02124
26841-26946	26896	0.02196
26872-26971	26921	0.015
26897-26996	26946	0.00698
26922-27021	26971	0.00923
26947-27046	26996	0.00852
26972-27071	27021	0.00704
26997-27096	27046	0.00704
27022-27121	27071	0.00352
27047-27146	27096	0.00976
27072-27171	27121	0.01093
27097-27196	27146	0.01513
27122-27221	27171	0.01579
27147-27246	27196	0.00884
27172-27271	27221	0.0063
27197-27296	27246	0.00209
27222-27321	27271	0.00352
27247-27346	27296	0.00942
27272-27371	27321	0.01603
27297-27396	27346	0.01873
27322-27421	27371	0.01664
27347-27446	27396	0.01217
27372-27471	27421	0.0109
27397-27496	27446	0.01452
27422-27521	27471	0.01997
27447-27546	27496	0.02124
27472-27571	27521	0.0159
27497-27596	27546	0.01095
27522-27621	27571	0.00479
27547-27646	27596	0.0028
27572-27671	27621	0.00632
27597-27696	27646	0.00622
27622-27721	27671	0.00693
27647-27746	27696	0.01019
27672-27771	27721	0.00804
27697-27796	27746	0.01003
27722-27821	27771	0.0113
27747-27846	27796	0.01003
27772-27874	27821	0.01206
27797-27899	27846	0.00881
27822-27924	27874	0.00683
27847-27949	27899	0.00413
27875-27974	27924	0.0027
27900-27999	27949	0.00407
27925-28024	27974	0.00622
27950-28049	27999	0.00765
27975-28074	28024	0.00907
28000-28099	28049	0.00698
28025-28124	28074	0.00556
28050-28149	28099	0.00622
28075-28174	28124	0.0028
28100-28199	28149	0.0028
28125-28224	28174	0.00352
28150-28249	28199	0.00413
28175-28274	28224	0.00688
28200-28299	28249	0.00688
28225-28324	28274	0.00831
28250-28349	28299	0.00815
28275-28374	28324	0.0054
28300-28399	28349	0.00749
28325-28424	28374	0.00463
28350-28449	28399	0.00209
28375-28474	28424	0.00601
28400-28499	28449	0.00463
28425-28524	28474	0.00463
28450-28549	28499	0.00717
28475-28574	28524	0.0054
28500-28599	28549	0.00468
28525-28624	28574	0.0054
28550-28649	28599	0.00423
28575-28674	28624	0.0055
28600-28699	28649	0.00622
28625-28724	28674	0.00688
28650-28749	28699	0.0055
28675-28774	28724	0.0028
28700-28799	28749	0.00489
28725-28824	28774	0.00352
28750-28849	28799	0.00865
28775-28874	28824	0.00794
28800-28899	28849	0.01008
28825-28924	28874	0.01008
28850-28949	28899	0.00566
28875-28974	28924	0.00907
28900-28999	28949	0.00484
28925-29024	28974	0.00765
28950-29049	28999	0.00902
28975-29074	29024	0.00831
29000-29099	29049	0.01101
29025-29124	29074	0.01019
29050-29149	29099	0.00947
29075-29174	29124	0.00677
29100-29199	29149	0.00611
29125-29224	29174	0.00413
29150-29249	29199	0.00275
29175-29274	29224	0.00545
29200-29312	29249	0.00897
29225-29337	29274	0.01183
29250-29362	29312	0.01601
29275-29388	29337	0.01545
29313-29413	29362	0.01897
29338-29446	29388	0.0182
29363-29471	29413	0.01688
29389-29540	29446	0.01616
29414-29566	29471	0.00921
29447-29591	29540	0.00854
29472-29616	29566	0.01116
29541-29663	29591	0.01608
29567-29688	29616	0.02127
29592-29760	29663	0.02791
29617-29785	29688	0.03347
29664-29819	29760	0.03251
29689-29867	29785	0.03926
29761-29901	29819	0.03598
29786-29955	29867	0.03516
29820-29992	29901	0.03968
29868-30017	29955	0.03341
29902-30042	29992	0.03005
29956-30238	30017	0.02336
29993-30263	30042	0.01553
30018-30301	30238	0.01542
30043-30329	30263	0.01608
30239-30364	30301	0.01608
30264-30967	30329	0.01892
30302-30992	30364	0.01053
30330-31017	30967	0.00844
30365-31042	30992	0.00492
30968-31070	31017	0.00336
30993-31095	31042	0.01614
31018-31122	31070	0.01828
31043-31147	31095	0.0204
31071-31216	31122	0.02484
31096-31241	31147	0.0173
31123-31266	31216	0.02452
31148-31291	31241	0.02574
31217-31316	31266	0.02328
31242-31350	31291	0.02019
31267-31375	31316	0.01296
31292-31400	31350	0.01101
31317-31458	31375	0.01685
31351-31508	31400	0.02902
31376-31538	31458	0.03233
31401-31563	31508	0.03974
31459-31597	31538	0.03746
31509-31634	31563	0.03251
31539-31674	31597	0.03582
31564-31864	31634	0.03095
31598-31889	31674	0.02347
31635-31914	31864	0.01624
31675-31939	31889	0.01664
31865-31964	31914	0.01272
31890-31989	31939	0.01267
31915-32014	31964	0.01124
31940-32039	31989	0.00688
31965-32064	32014	0.01251
31990-32089	32039	0.02235
32015-32119	32064	0.035
32040-32564	32089	0.04019
32065-32590	32119	0.04349
32090-32615	32564	0.03825
32540-32641	32590	0.03122
32565-32686	32615	0.02997
32591-33018	32641	0.02918
32616-33043	32686	0.02601
32642-33068	33018	0.02304
32687-33093	33043	0.01503
33019-33118	33068	0.00825
33044-33143	33093	0.00886
33069-33168	33118	0.01249
33094-33198	33143	0.01733
33119-33229	33168	0.01804
33144-33254	33198	0.01976
33169-33279	33229	0.02167
33199-33354	33254	0.02754
33230-33379	33279	0.03357
33255-33418	33354	0.03648
33314-34042	33379	0.03976
33355-34298	33418	0.03989
33380-34330	34042	0.03778
33419-34359	34298	0.03759
34043-34384	34330	0.03217
34299-34450	34359	0.02865
34331-34475	34384	0.02336
34360-34500	34450	0.0155
34385-34529	34475	0.00876
34451-34565	34500	0.00839
34476-34590	34529	0.01164
34501-34615	34565	0.01725
34530-34779	34590	0.02608
34566-34804	34615	0.02124
34591-34829	34779	0.0264
34616-34854	34804	0.02079
34780-34879	34829	0.01333
34805-34904	34854	0.01304
34830-34929	34879	0.00667
34855-34954	34904	0.01452
34880-34979	34929	0.01667
34905-35004	34954	0.01413
34930-35029	34979	0.01138
34955-35054	35004	0.00423
34980-35079	35029	0.00392
35005-35104	35054	0.00606
35030-35142	35079	0.01439
35055-35167	35104	0.02074
35080-35192	35142	0.02429
35105-35217	35167	0.02693
35143-35250	35192	0.02598
35168-36381	35217	0.03069
35193-36419	35250	0.02995
35218-36444	36381	0.03249
35251-36514	36419	0.03111
36382-36545	36444	0.02788
36420-36584	36514	0.02188
36445-36609	36545	0.01455
36515-36634	36584	0.00854
36546-36659	36609	0.00659
36585-36803	36634	0.01786
36610-36828	36659	0.02127
36635-36853	36803	0.0227
36660-36886	36828	0.02111
36804-36944	36853	0.01545
36829-36969	36886	0.01275
36854-36994	36944	0.01646
36887-37020	36969	0.01796
36945-37050	36994	0.01704
36970-37077	37020	0.03034
36995-37115	37050	0.02862
37021-37140	37077	0.03045
37051-37171	37115	0.03111
37081-37236	37140	0.0227
37116-37271	37171	0.02804
37141-37345	37236	0.02042
37172-37370	37271	0.01778
37237-37401	37345	0.02799
37272-37439	37370	0.02495
37346-37534	37401	0.03474
37371-37576	37439	0.03415
37402-37601	37534	0.02296
37440-37626	37576	0.02468
37535-37656	37601	0.01627
37577-37681	37626	0.01669
37602-37706	37656	0.01468
37627-37731	37681	0.0105
37657-37756	37706	0.00841
37682-37781	37731	0.00786
37707-37806	37756	0.00667
37732-37831	37781	0.00413
37757-37856	37806	0.00693
37782-37881	37831	0.00638
37807-37906	37856	0.00495
37832-37931	37881	0.00989
37857-37956	37906	0.0078
37882-37981	37931	0.00709
37907-38006	37956	0.0078
37932-38031	37981	0.00519
37957-38056	38006	0.00868
37982-38081	38031	0.00796
38007-38106	38056	0.00725
38032-38131	38081	0.00619
38057-38156	38106	0.00407
38082-38181	38131	0.00606
38107-38206	38156	0.0086
38132-38231	38181	0.00661
38157-38256	38206	0.00452
38182-38281	38231	0.00325
38207-38306	38256	0.00071
38232-38331	38281	0.0069
38257-38356	38306	0.01177
38282-38381	38331	0.01304
38307-38406	38356	0.01376
38332-38431	38381	0.01169
38357-38456	38406	0.00754
38382-38481	38431	0.0086
38407-38506	38456	0.0086
38432-38531	38481	0.00519
38457-38556	38506	0.00519
38482-38581	38531	0.00484
38507-38606	38556	0.00484
38532-38631	38581	0.00413
38557-38656	38606	0.0081
38582-38681	38631	0.0054
38607-38706	38656	0.00468
38632-38731	38681	0.00468
38657-38756	38706	0.00071
38682-38781	38731	0.00143
38707-38806	38756	0.00214
38732-38831	38781	0.00357
38757-38856	38806	0.00286
38782-38881	38831	0.00635
38807-38906	38856	0.00563
38832-38931	38881	0.00492
38857-38956	38906	0.00492
38882-38981	38931	0.00352
38907-39006	38956	0.00423
38932-39031	38981	0.00352
38957-39056	39006	0.00622
38982-39081	39031	0.00413
39007-39106	39056	0.0054
39032-39131	39081	0.00611
39057-39156	39106	0.00341
39082-39181	39131	0.0027
39107-39206	39156	0.00143
39132-39231	39181	0.00143
39157-39256	39206	0.00746
39182-39281	39231	0.01233
39207-39306	39256	0.01442
39232-39331	39281	0.01442
39257-39356	39306	0.00839
39282-39381	39331	0.0118
39307-39406	39356	0.00899
39332-39431	39381	0.00828
39357-39456	39406	0.00899
39382-39481	39431	0.00325
39407-39506	39456	0.00534
39432-39531	39481	0.00606
39457-39556	39506	0.0086
39482-39581	39531	0.00876
39507-39606	39556	0.00667
39532-39631	39581	0.01257
39557-39656	39606	0.00931
39582-39681	39631	0.00733
39607-39706	39656	0.01019
39632-39731	39681	0.00357
39657-39756	39706	0.00495
39682-39781	39731	0.00495
39707-39806	39756	0.00209
39732-39831	39781	0.00479
39757-39856	39806	0.00876
39782-39881	39831	0.00804
39807-39906	39856	0.00804
39832-39931	39881	0.00995
39857-39956	39906	0.00603
39882-39981	39931	0.00603
39907-40006	39956	0.00603
39932-40031	39981	0.00563
39957-40056	40006	0.00421
39982-40081	40031	0.00421
40007-40106	40056	0.00725
40032-40131	40081	0.00725
40057-40237	40106	0.01548
40082-40270	40131	0.03442
40107-40296	40237	0.03463
40153-40321	40270	0.03847
40238-40346	40296	0.03024
40271-40371	40321	0.01537
40297-40396	40346	0.01349
40322-40452	40371	0.00616
40347-40492	40396	0.01516
40372-40531	40452	0.01444
40397-40556	40492	0.01307
40453-40581	40531	0.01894
40493-40606	40556	0.0154
40532-40631	40581	0.01868
40557-40656	40606	0.02066
40582-40681	40631	0.01407
40607-40706	40656	0.01188
40632-40731	40681	0.00987
40657-40756	40706	0.00788
40682-40781	40731	0.0086
40707-40806	40756	0.00606
40732-40831	40781	0.00688
40757-40856	40806	0.0131
40782-40910	40831	0.01667
40807-40943	40856	0.01876
40832-40973	40910	0.01921
40857-41004	40943	0.01767
40911-41038	40973	0.01833
40944-41077	41004	0.01751
40974-41102	41038	0.01304
41005-41127	41077	0.00907
41039-41152	41102	0.00413
41078-41177	41127	0.00413
41103-41206	41152	0.01339
41128-41283	41177	0.02249
41153-41319	41206	0.02458
41178-41345	41283	0.03183
41207-41370	41319	0.02418
41285-41395	41345	0.01508
41320-41420	41370	0.0137
41346-41451	41395	0.00519
41371-41476	41420	0.01008
41396-41506	41451	0.0214
41421-41531	41476	0.02659
41452-41558	41506	0.02868
41477-41583	41531	0.02804
41507-41611	41558	0.01942
41532-41636	41583	0.01772
41559-41661	41611	0.01492
41584-41686	41636	0.01016
41612-41711	41661	0.00675
41637-41736	41686	0.00325
41662-41761	41711	0.00325
41687-41786	41736	0.00071
41712-41811	41761	0.00143
41737-41836	41786	0.00143
41762-41861	41811	0.00638
41787-41886	41836	0.00638
41812-41911	41861	0.00566
41837-41946	41886	0.00704
41862-41972	41911	0.00352
41887-42002	41946	0.01188
41912-42035	41972	0.01585
41947-42070	42002	0.01963
41973-42109	42035	0.02103
42003-42134	42070	0.01339
42036-42159	42109	0.01275
42071-42184	42134	0.00825
42110-42209	42159	0.00685
42135-42234	42184	0.00614
42160-42259	42209	0.00423
42185-42284	42234	0.00286
42210-42309	42259	0.00143
42235-42334	42284	0.00214
42260-42359	42309	0.00071
42285-42384	42334	0.00071
42310-42409	42359	0.00397
42335-42434	42384	0.0063
42360-42459	42409	0.00934
42385-42484	42434	0.00934
42410-42509	42459	0.0068
42435-42534	42484	0.00376
42460-42559	42509	0.00071
42485-42584	42534	0.00071
42510-42609	42559	0.00582
42535-42634	42584	0.00791
42560-42659	42609	0.00791
42585-42684	42634	0.01167
42610-42709	42659	0.00728
42635-42734	42684	0.0059
42660-42759	42709	0.00661
42685-42784	42734	0.00286
42710-42809	42759	0.00214
42735-42834	42784	0.00341
42760-42859	42809	0.00341
42785-42884	42834	0.00733
42810-42909	42859	0.00733
42835-42934	42884	0.0086
42860-42959	42909	0.0086
42885-42984	42934	0.0054
42910-43009	42959	0.00876
42935-43034	42984	0.00693
42960-43059	43009	0.01188
42985-43084	43034	0.01116
43010-43109	43059	0.0078
43035-43134	43084	0.00638
43060-43159	43109	0.00341
43085-43184	43134	0.00341
43110-43209	43159	0.00413
43135-43234	43184	0.00484
43160-43259	43209	0.00214
43185-43284	43234	0.00214
43210-43309	43259	0.00143
43235-43334	43284	0.00325
43260-43359	43309	0.00397
43285-43384	43334	0.00817
43310-43409	43359	0.0128
43335-43434	43384	0.01026
43360-43459	43409	0.01026
43385-43484	43434	0.00606
43410-43509	43459	0.00143
43435-43534	43484	0.00341
43460-43559	43509	0.00341
43485-43584	43534	0.00413
43510-43609	43559	0.00341
43535-43634	43584	0.00214
43560-43659	43609	0.00423
43585-43684	43634	0.00352
43610-43709	43659	0.00352
43635-43734	43684	0.0028
43660-43759	43709	0
43685-43784	43734	0
43710-43809	43759	0.00071
43735-43834	43784	0.00071
43760-43859	43809	0.00214
43785-43884	43834	0.00214
43810-43909	43859	0.00143
43835-43934	43884	0.0028
43860-43959	43909	0.00463
43885-43984	43934	0.00603
43910-44009	43959	0.00675
43935-44034	43984	0.00608
43960-44059	44009	0.00426
43985-44084	44034	0.00286
44010-44109	44059	0.00286
44035-44134	44084	0.00357
44060-44159	44109	0.00214
44085-44184	44134	0.00214
44110-44209	44159	0.00143
44135-44234	44184	0
44160-44259	44209	0
44185-44284	44234	0.00071
44210-44309	44259	0.00209
44235-44334	44284	0.00209
44260-44359	44309	0.00209
44285-44384	44334	0.00138
44310-44409	44359	0.0027
44335-44434	44384	0.00468
44360-44459	44409	0.0054
44385-44484	44434	0.00611
44410-44509	44459	0.00341
44435-44534	44484	0.00214
44460-44559	44509	0.00143
44485-44584	44534	0.00143
44510-44609	44559	0.0028
44535-44634	44584	0.00479
44560-44659	44609	0.00622
44585-44684	44634	0.00622
44610-44709	44659	0.00738
44635-44734	44684	0.00963
44660-44759	44709	0.0082
44685-44784	44734	0.00749
44710-44809	44759	0.00566
44735-44834	44784	0.00352
44760-44859	44809	0.00423
44785-44884	44834	0.00495
44810-44909	44859	0.00561
44835-44934	44884	0.00606
44860-44959	44909	0.00534
44885-44984	44934	0.00463
44910-45009	44959	0.00325
44935-45034	44984	0
44960-45059	45009	0
44985-45084	45034	0.00325
45010-45109	45059	0.00325
45035-45134	45084	0.00325
45060-45159	45109	0.00397
45085-45184	45134	0.00071
45110-45209	45159	0.00214
45135-45234	45184	0.00214
45160-45259	45209	0.00143
45185-45284	45234	0.00143
45210-45309	45259	0.00071
45235-45334	45284	0.00071
45260-45359	45309	0.00071
45285-45384	45334	0.00209
45310-45409	45359	0.00209
45335-45434	45384	0.00407
45360-45459	45409	0.0055
45385-45484	45434	0.00484
45410-45509	45459	0.00484
45435-45534	45484	0.00357
45460-45559	45509	0.00563
45485-45584	45534	0.00563
45510-45609	45559	0.00563
45535-45634	45584	0.00849
45560-45659	45609	0.00698
45585-45684	45634	0.01048
45610-45709	45659	0.00976
45635-45734	45684	0.00619
45660-45759	45709	0.00421
45685-45784	45734	0.00413
45710-45809	45759	0.00611
45735-45834	45784	0.00683
45760-45859	45809	0.01008
45785-45884	45834	0.00595
45810-45909	45859	0.00595
45835-45934	45884	0.00595
45860-45959	45909	0.0027
45885-45984	45934	0.0027
45910-46009	45959	0.00143
45935-46034	45984	0.00376
45960-46059	46009	0.00376
45985-46084	46034	0.00574
46010-46109	46059	0.0064
46035-46134	46084	0.00545
46060-46159	46109	0.0095
46085-46184	46134	0.00751
46110-46209	46159	0.00884
46135-46234	46184	0.00746
46160-46259	46209	0.00675
46185-46284	46234	0.00675
46210-46309	46259	0.0073
46235-46334	46284	0.00659
46260-46359	46309	0.00579
46285-46384	46334	0.00976
46310-46409	46359	0.00849
46335-46434	46384	0.00849
46360-46459	46409	0.00667
46385-46484	46434	0.00667
46410-46509	46459	0.00611
46435-46534	46484	0.00683
46460-46559	46509	0.00611
46485-46584	46534	0.00214
46510-46609	46559	0.00071
46535-46634	46584	0.00722
46560-46663	46609	0.00937
46585-46696	46634	0.01146
46610-46721	46663	0.02108
46635-46746	46696	0.01794
46664-46771	46721	0.01651
46697-46796	46746	0.02101
46722-46822	46771	0.01894
46747-46847	46796	0.02627
46772-46891	46822	0.0277
46797-47158	46847	0.02733
46823-47191	46891	0.02598
46867-47216	47158	0.01981
46892-47241	47191	0.01767
47159-47266	47216	0.01146
47192-47291	47241	0.00595
47217-47316	47266	0.0027
47242-47341	47291	0.00479
47267-47366	47316	0.0055
47292-47391	47341	0.0055
47317-47416	47366	0.00352
47342-47443	47391	0.00643
47367-47468	47416	0.0077
47392-47497	47443	0.02487
47417-47526	47468	0.02971
47444-47551	47497	0.02542
47469-47576	47526	0.03164
47498-47601	47551	0.01447
47527-47626	47576	0.01376
47552-47651	47601	0.01926
47577-47676	47626	0.01243
47602-47713	47651	0.0231
47627-47749	47676	0.02222
47652-47774	47713	0.01942
47677-47799	47749	0.01804
47714-47824	47774	0.00667
47750-47849	47799	0.00341
47775-47879	47824	0.0028
47800-47905	47849	0.0091
47825-47930	47879	0.0091
47850-47960	47905	0.00981
47880-47985	47930	0.01042
47906-48010	47960	0.00413
47931-48035	47985	0.00611
47961-48060	48010	0.0054
47986-48085	48035	0.01058
48011-48110	48060	0.01196
48036-48142	48085	0.02688
48061-48167	48110	0.02688
48086-48192	48142	0.01899
48111-48217	48167	0.01833
48143-48242	48192	0.00143
48168-48267	48217	0.00413
48193-48292	48242	0.00341
48218-48317	48267	0.0027
48243-48342	48292	0.0027
48268-48367	48317	0.00071
48293-48392	48342	0.00071
48318-48417	48367	0.00143
48343-48442	48392	0.00143
48368-48467	48417	0.00143
48393-48514	48442	0.00286
48418-48539	48467	0.00976
48443-48564	48514	0.01246
48468-48589	48539	0.01704
48515-48626	48564	0.01841
48540-48651	48589	0.01503
48565-48676	48626	0.01304
48590-48701	48651	0.01079
48627-48726	48676	0.01079
48652-48751	48701	0.0087
48677-48781	48726	0.00799
48702-48806	48751	0.00709
48727-48831	48781	0.0141
48752-48856	48806	0.01267
48782-48885	48831	0.0141
48807-48910	48856	0.01394
48832-48935	48885	0.00952
48857-48966	48910	0.01751
48886-48991	48935	0.01751
48911-49016	48966	0.01696
48936-49041	48991	0.01497
48967-49074	49016	0.0123
48992-49103	49041	0.01611
49017-49134	49074	0.02495
49042-49159	49103	0.02153
49075-49184	49134	0.01622
49104-49209	49159	0.01241
49135-49234	49184	0.00214
49160-49259	49209	0.00214
49185-49284	49234	0.00143
49210-49309	49259	0.01265
49235-49336	49284	0.02114
49260-49361	49309	0.02257
49285-49766	49336	0.02598
49310-49791	49361	0.02439
49337-49816	49766	0.01802
49362-49854	49791	0.01944
49767-49879	49816	0.01603
49792-49904	49854	0.00569
49817-49929	49879	0.00833
49855-49954	49904	0.00897
49880-49979	49929	0.0131
49905-50016	49954	0.02111
49930-50044	49979	0.02495
49955-50086	50016	0.02894
49980-50121	50044	0.04386
50017-50198	50086	0.03997
50045-50233	50121	0.03585
50087-50264	50198	0.03233
50122-50289	50233	0.02146
50199-50314	50264	0.03093
50234-50339	50289	0.02844
50265-50364	50314	0.02788
50290-50389	50339	0.02611
50315-50414	50364	0.01251
50340-50439	50389	0.01262
50365-50464	50414	0.01786
50390-50489	50439	0.01288
50415-50514	50464	0.01431
50440-50539	50489	0.01294
50465-50564	50514	0.005
50490-50589	50539	0.00357
50515-50614	50564	0.00143
50540-50639	50589	0.0027
50565-50664	50614	0.0046
50590-50689	50639	0.0073
50615-50714	50664	0.00802
50640-50739	50689	0.00675
50665-50764	50714	0.00717
50690-50789	50739	0.00447
50715-50814	50764	0.00376
50740-50839	50789	0.00447
50765-50864	50814	0.00481
50790-50889	50839	0.00751
50815-50914	50864	0.00751
50840-50945	50889	0.0068
50865-50980	50914	0.01098
50890-51005	50945	0.0263
50915-51030	50980	0.02841
50946-51055	51005	0.0359
50981-51081	51030	0.03611
51006-51106	51055	0.02093
51031-51131	51081	0.02791
51056-51156	51106	0.03005
51082-51181	51131	0.02772
51107-51206	51156	0.03101
51132-51231	51181	0.03521
51157-51279	51206	0.0291
51182-51304	51231	0.02365
51207-51329	51279	0.01754
51232-51378	51304	0.00561
51280-51425	51329	0.00688
51305-51450	51378	0.01101
51330-51736	51425	0.03799
51379-51789	51450	0.0631
51426-51825	51736	0.095
51451-51973	51789	0.09437
51737-51998	51825	0.08249
51790-52027	51973	0.0673
51826-52052	51998	0.03397
51974-52166	52027	0.03526
51999-52210	52052	0.03082
52028-52237	52166	0.0309
52053-52262	52210	0.03111
52167-52297	52237	0.03172
52211-52322	52262	0.02386
52238-52348	52297	0.01249
52263-52373	52322	0.01217
52298-52398	52348	0.00677
52323-52423	52373	0.00831
52349-52448	52398	0.01201
52374-52474	52423	0.00942
52399-52500	52448	0.01354
52424-52532	52474	0.00921
52449-52557	52500	0.00947
52475-52582	52532	0.01405
52508-53272	52557	0.01868
52533-53297	52582	0.02354
52558-53327	53272	0.02167
52583-53352	53297	0.02278
53273-53377	53327	0.01545
53298-53402	53352	0.01799
53328-53428	53377	0.02103
53353-53453	53402	0.01397
53378-53478	53428	0.01749
53403-53542	53453	0.01614
53429-53723	53478	0.02802
53454-53758	53542	0.03585
53479-53783	53723	0.04114
53543-53808	53758	0.04198
53724-53834	53783	0.02905
53759-53859	53808	0.03196
53784-53884	53834	0.02476
53809-53909	53859	0.01786
53835-53934	53884	0.01378
53860-53968	53909	0.00503
53885-54201	53934	0.02614
53910-54281	53968	0.05434
53935-54314	54201	0.0846
53969-54339	54281	0.09138
54202-54364	54314	0.07135
54282-54389	54339	0.05638
54315-54414	54364	0.03476
54340-54453	54389	0.03204
54365-56943	54414	0.03127
54390-56968	54453	0.01947
54415-57000	56943	0.0232
54454-57033	56968	0.03008
56944-57058	57000	0.03328
56969-57109	57033	0.04577
57001-57135	57058	0.03339
57034-57160	57109	0.02614
57059-57185	57135	0.02598
57110-57210	57160	0.01476
57136-57235	57185	0.01884
57161-57265	57210	0.01389
57186-57301	57235	0.0109
57211-57334	57265	0.01712
57236-57359	57301	0.01513
57266-57384	57334	0.01862
57302-57411	57359	0.01521
57335-57437	57384	0.01262
57360-57462	57411	0.01053
57385-57487	57437	0.0077
57412-57512	57462	0.01616
57438-57537	57487	0.01056
57463-57562	57512	0.01265
57488-57587	57537	0.01503
57513-57612	57562	0.01143
57538-57644	57587	0.01214
57563-57669	57612	0.01148
57588-57694	57644	0.00981
57613-57719	57669	0.00849
57645-57744	57694	0.01429
57670-57769	57719	0.01357
57695-57794	57744	0.01148
57720-57819	57769	0.01063
57745-57844	57794	0.0055
57770-57872	57819	0.0082
57795-57906	57844	0.01399
57820-57943	57872	0.0227
57845-57976	57906	0.02876
57873-58001	57943	0.03257
57907-58026	57976	0.02677
57944-58051	58001	0.0168
57977-58076	58026	0.00865
58002-58101	58051	0.01103
58027-58126	58076	0.01175
58052-58267	58101	0.02365
58077-58313	58126	0.03376
58102-58338	58267	0.02415
58127-58363	58313	0.02344
58268-58388	58338	0.01011
58314-58413	58363	0
58339-58438	58388	0.00143
58364-58463	58413	0.00357
58389-58488	58438	0.00566
58414-58513	58463	0.00709
58439-58538	58488	0.00836
58464-58563	58513	0.00622
58489-58588	58538	0.00556
58514-58613	58563	0.0081
58539-58638	58588	0.00611
58564-58663	58613	0.00754
58589-58688	58638	0.00683
58614-58713	58663	0.00429
58639-58738	58688	0.00357
58664-58763	58713	0.00357
58689-58788	58738	0.00635
58714-58813	58763	0.00902
58739-58838	58788	0.00902
58764-58863	58813	0.00759
58789-58888	58838	0.00664
58814-58913	58863	0.00325
58839-58938	58888	0.00468
58864-58963	58913	0.00468
58889-58988	58938	0.00352
58914-59013	58963	0.0028
58939-59038	58988	0.00413
58964-59063	59013	0.00788
58989-59088	59038	0.00651
59014-59113	59063	0.01026
59039-59138	59088	0.00751
59064-59163	59113	0.00447
59089-59188	59138	0.00783
59114-59213	59163	0.0055
59139-59238	59188	0.0055
59164-59263	59213	0.00479
59189-59288	59238	0.00638
59214-59313	59263	0.00632
59239-59338	59288	0.00704
59264-59363	59313	0.00913
59289-59388	59338	0.00489
59314-59413	59363	0.00352
59339-59438	59388	0.0028
59364-59463	59413	0.00071
59389-59488	59438	0
59414-59513	59463	0.0014
59439-59538	59488	0.0041
59464-59563	59513	0.0041
59489-59588	59538	0.00481
59514-59613	59563	0.0069
59539-59638	59588	0.00492
59564-59663	59613	0.00563
59589-59688	59638	0.00563
59614-59713	59663	0.00476
59639-59738	59688	0.0068
59664-59763	59713	0.01212
59689-59788	59738	0.01212
59714-59813	59763	0.01021
59739-59838	59788	0.00889
59764-59863	59813	0.00495
59789-59888	59838	0.00704
59814-59913	59863	0.01045
59839-59938	59888	0.00974
59864-59963	59913	0.00765
59889-59988	59938	0.00556
59914-60013	59963	0.00143
59939-60038	59988	0.00071
59964-60063	60013	0.0028
59989-60088	60038	0.00209
60014-60113	60063	0.00352
60039-60138	60088	0.00743
60064-60163	60113	0.00995
60089-60188	60138	0.01138
60114-60236	60163	0.01646
60139-60261	60188	0.0182
60164-60293	60236	0.02034
60189-60331	60261	0.02233
60237-60356	60293	0.01857
60267-60381	60331	0.01831
60294-60406	60356	0.01722
60332-60499	60381	0.02317
60357-60524	60406	0.02889
60382-60564	60499	0.02421
60407-60590	60524	0.02053
60500-61093	60564	0.01944
60525-61170	60590	0.0178
60565-61269	61093	0.02897
60591-61305	61170	0.03302
61094-61330	61269	0.02743
61171-61355	61305	0.02132
61270-61380	61330	0.01016
61306-61412	61355	0.00556
61331-61466	61380	0.00661
61356-61491	61412	0.00997
61381-61516	61466	0.00926
61413-61541	61491	0.00783
61467-61566	61516	0.00407
61492-61591	61541	0.00071
61517-61616	61566	0.00214
61542-61641	61591	0.00214
61567-61666	61616	0.00529
61592-61691	61641	0.00529
61617-61716	61666	0.00458
61642-61741	61691	0.00931
61667-61766	61716	0.00616
61692-61791	61741	0.00545
61717-61816	61766	0.00474
61742-61841	61791	0.02
61767-61866	61816	0.02
61792-61891	61841	0.02
61817-61916	61866	0.02
61842-61941	61891	0.00278
61867-61966	61916	0.00349
61892-61991	61941	0.0063
61917-62016	61966	0.00963
61942-62041	61991	0.00757
61967-62066	62016	0.01148
61992-62091	62041	0.00868
62017-62116	62066	0.00606
62042-62141	62091	0.00534
62067-62166	62116	0.00071
62092-62191	62141	0.00071
62117-62216	62166	0
62142-62241	62191	0.00423
62167-62266	62216	0.00857
62192-62291	62241	0.00857
62217-62316	62266	0.01278
62242-62341	62291	0.01063
62267-62366	62316	0.00839
62292-62391	62341	0.0091
62317-62416	62366	0.00561
62342-62441	62391	0.00561
62367-62466	62416	0.00423
62392-62491	62441	0.00352
62417-62516	62466	0.0028
62442-62541	62491	0.00071
62467-62566	62516	0.00254
62492-62591	62541	0.00254
62517-62616	62566	0.00325
62542-62641	62591	0.00579
62567-62666	62616	0.00325
62592-62691	62641	0.00397
62617-62716	62666	0.00397
62642-62741	62691	0.00143
62667-62766	62716	0.00286
62692-62791	62741	0.00418
62717-62816	62766	0.00489
62742-62841	62791	0.00489
62767-62866	62816	0.00347
62792-62891	62841	0.00413
62817-62916	62866	0.0027
62842-62941	62891	0.00595
62867-62966	62916	0.01963
62892-62991	62941	0.01947
62917-63021	62966	0.02354
62942-63050	62991	0.0231
62967-63075	63021	0.01013
62992-63112	63050	0.05164
63022-63163	63075	0.05828
63051-63192	63112	0.06873
63084-63253	63163	0.07534
63113-63326	63192	0.04386
63164-63360	63253	0.03656
63193-63416	63326	0.03201
63254-63442	63360	0.02683
63327-63468	63416	0.01696
63361-63530	63442	0.02177
63417-63566	63468	0.02757
63443-63592	63530	0.03164
63469-63617	63566	0.03175
63531-63845	63592	0.02825
63567-63870	63617	0.0163
63593-63905	63845	0.01487
63618-63930	63870	0.01833
63846-63955	63905	0.01503
63871-63980	63930	0.01386
63906-64005	63955	0.0105
63931-64063	63980	0.01116
63956-64088	64005	0.01447
63981-64113	64063	0.02135
64030-64138	64088	0.02206
64064-64163	64113	0.01926
64089-64188	64138	0.01524
64114-64213	64163	0.00897
64139-64238	64188	0.01034
64164-64263	64213	0.01439
64189-64288	64238	0.01836
64214-64313	64263	0.02421
64239-64338	64288	0.0214
64264-64363	64313	0.01323
64289-64388	64338	0.01063
64314-64413	64363	0.00352
64339-64438	64388	0.01153
64364-64463	64413	0.01505
64389-64488	64438	0.02185
64414-64513	64463	0.02566
64439-64545	64488	0.0322
64464-64576	64513	0.0381
64489-64601	64545	0.02921
64514-64626	64576	0.02611
64546-64651	64601	0.01085
64577-64676	64626	0.00143
64602-64701	64651	0.0028
64627-64726	64676	0.00421
64652-64751	64701	0.00421
64677-64776	64726	0.00635
64702-64801	64751	0.00569
64727-64826	64776	0.01437
64752-64851	64801	0.01574
64777-64876	64826	0.01892
64802-64901	64851	0.01892
64827-64926	64876	0.00812
64852-64951	64901	0.01021
64877-64976	64926	0.0119
64902-65001	64951	0.01905
64927-65026	64976	0.01976
64952-65051	65001	0.0163
64977-65076	65026	0.01071
65002-65101	65051	0.00738
65027-65126	65076	0.00804
65052-65151	65101	0.00947
65077-65176	65126	0.00804
65102-65201	65151	0.00495
65127-65226	65176	0.0054
65152-65251	65201	0.00788
65177-65276	65226	0.01399
65202-65301	65251	0.01471
65227-65326	65276	0.01614
65252-65351	65301	0.02037
65277-65376	65326	0.02423
65302-65531	65351	0.0296
65327-65556	65376	0.02974
65352-65587	65531	0.03045
65377-65612	65556	0.02709
65532-65651	65587	0.0254
65557-65676	65612	0.0241
65588-65716	65651	0.02587
65613-65926	65676	0.02942
65652-65951	65716	0.03476
65677-65985	65926	0.04016
65717-66010	65951	0.03365
65927-66035	65985	0.02921
65952-66065	66010	0.02431
65986-66114	66035	0.04019
66011-66149	66065	0.04807
66036-66180	66114	0.04923
66066-66210	66149	0.05434
66115-66253	66180	0.03783
66150-66302	66210	0.03423
66186-66340	66253	0.03577
66211-66365	66302	0.02997
66254-66392	66340	0.02241
66303-66417	66365	0.01399
66341-66442	66392	0.0063
66366-66467	66417	0.00071
66393-66507	66442	0.00071
66418-66555	66467	0.00341
66443-66798	66507	0.02206
66468-66823	66555	0.03476
66508-66857	66798	0.03548
66556-66884	66823	0.03349
66799-66911	66857	0.02108
66824-66936	66884	0.01733
66858-66961	66911	0.01733
66885-66986	66936	0.01661
66912-67011	66961	0.00966
66937-67036	66986	0.00397
66962-67061	67011	0.00325
66987-67086	67036	0.00397
67012-67111	67061	0.0054
67037-67136	67086	0.00429
67062-67161	67111	0.005
67087-67186	67136	0.00566
67112-67211	67161	0.00495
67137-67236	67186	0.00495
67162-67261	67211	0.00423
67187-67286	67236	0.00693
67212-67311	67261	0.01333
67237-67336	67286	0.01262
67262-67361	67311	0.01828
67287-67386	67336	0.01421
67312-67411	67361	0.01421
67337-67436	67386	0.0163
67362-67461	67411	0.01135
67387-67486	67436	0.01587
67412-67511	67461	0.01553
67437-68256	67486	0.01929
67462-68295	67511	0.01929
67487-68320	68256	0.01619
67512-68345	68295	0.01085
68257-68370	68320	0.00357
68296-68395	68345	0.01479
68321-68420	68370	0.01683
68346-68445	68395	0.02526
68371-68470	68420	0.03288
68396-68495	68445	0.02492
68421-68520	68470	0.0263
68446-68545	68495	0.01968
68471-68570	68520	0.01476
68496-68595	68545	0.01288
68521-68620	68570	0.01336
68546-68645	68595	0.01225
68571-68670	68620	0.01026
68596-68695	68645	0.01341
68621-68720	68670	0.0081
68646-68745	68695	0.00595
68671-68770	68720	0.00722
68696-68795	68745	0.0027
68721-68820	68770	0.0027
68746-68845	68795	0.00611
68771-68870	68820	0.0082
68796-68895	68845	0.00749
68821-68920	68870	0.00886
68846-68945	68895	0.00616
68871-68970	68920	0.0028
68896-69000	68945	0.00352
68921-69025	68970	0.01077
68946-69050	69000	0.01558
68971-69083	69025	0.02146
69001-69117	69050	0.02286
69026-69166	69083	0.02241
69051-69191	69117	0.01897
69084-69216	69166	0.01635
69118-69241	69191	0.01566
69167-69266	69216	0.01386
69192-69291	69241	0.01177
69217-69316	69266	0.01177
69242-69341	69291	0.01106
69267-69366	69316	0.00468
69292-69391	69341	0.00468
69317-69416	69366	0.00143
69342-69441	69391	0.00214
69367-69466	69416	0.00214
69392-69491	69441	0.00214
69417-69516	69466	0.00143
69442-69541	69491	0
69467-69566	69516	0.00325
69492-69591	69541	0.00325
69517-69616	69566	0.00794
69542-69641	69591	0.00937
69567-69666	69616	0.00865
69592-69691	69641	0.00937
69617-69716	69666	0.0054
[truncated: 2,947 more rows]
