# Supplementary material for: The Complete Chloroplast Genomes of Bulbophyllum (Orchidaceae) Species: Insight into Genome Structure Divergence and Phylogenetic Analysis
Source: Int J Mol Sci. 2024 Feb 25;25(5):2665. doi: 10.3390/ijms25052665 (PMC10932260; doi:10.3390/ijms25052665)
Supplement: Supplementary file 1 [file ijms-25-02665-s001.zip › Supplementary Table S8.xlsx]

## Sheet: Sheet1
Supplementary Table S8 Nucleotide diversity of protein-coding genes among 28 Bulbophyllum chloroplast genomes.
Genes	Nucleotide diversity
accD	0.01455
atpA	0.0091
atpB	0.00616
atpE	0.00754
atpF	0.00756
atpH	0.00375
atpI	0.00687
ccsA	0.015
cemA	0.01145
clpP	0.00797
infA	0.00852
matK	0.02178
petA	0.0071
petB	0.0055
petD	0.00476
petG	0.00355
petL	0.00355
petN	0.00532
psaA	0.00491
psaB	0.00457
psaC	0.00361
psaI	0.00064
psaJ	0.00845
psbA	0.00675
psbB	0.0043
psbC	0.00618
psbD	0.0067
psbE	0.00378
psbF	0.0034
psbH	0.00721
psbI	0.00371
psbJ	0.00667
psbK	0.01599
psbL	0.00631
psbM	0.00786
psbN	0.00162
psbT	0.00415
psbZ	0.00819
rbcL	0.00716
rpl14	0.00783
rpl16	0.00888
rpl2	0.00218
rpl20	0.01347
rpl22	0.00929
rpl23	0.001
rpl32	0.01005
rpl33	0.01319
rpl36	0.01476
rpoA	0.01398
rpoB	0.00788
rpoC1	0.00735
rpoC2	0.0116
rps11	0.01096
rps12	0.02643
rps14	0.00457
rps15	0.01511
rps16	0.00903
rps18	0.00737
rps19	0.00325
rps2	0.0103
rps3	0.01195
rps4	0.00752
rps7	0.00046
rps8	0.0103
ycf1	0.02956
ycf2	0.00404
ycf3	0.00246
ycf4	0.00927
