# Supplementary material for: The Complete Chloroplast Genomes of Bulbophyllum (Orchidaceae) Species: Insight into Genome Structure Divergence and Phylogenetic Analysis
Source: Int J Mol Sci. 2024 Feb 25;25(5):2665. doi: 10.3390/ijms25052665 (PMC10932260; doi:10.3390/ijms25052665)
Supplement: Supplementary file 1 [file ijms-25-02665-s001.zip › Supplementary Table S9.xlsx]

## Sheet: Sheet1
Supplementary Table S9 Taxon information in phylogenetic analyses.
Taxa	Accession number	reference
Bulbophyllum affine	LC556091	Yang et al. (2020)
B. ambrosia	PP315905*	This study
B. andersonii	LC703293	Yang et al. (2022)
B. crassipes	PP315906*	This study
B. disciflorum	LC498826	Tang et al.(2020)
B. exaltatum	MN604054	Zavala-Páez et al. (2020)
B. farreri	PP315907*	This study
B. gedangense	MW161053	Tang et al. (2021)
B. granulosum	MN604055	Zavala-Páez et al. (2020)
B. hamatum	PP315908*	This study
B. hirtum	LC642724	Yang et al. (2022)
B. inconspicuum	MN200377	Kim et al.(2020)
B. kwangtungense	LC642722	Yang et al. (2022)
B. leopardinum	LC642723	Yang et al. (2022)
B. lingii	MW161052	Tang et al. (2021)
B. menghaiense	MW161050	Tang et al. (2021)
B. mentosum	MN604056	Zavala-Páez et al. (2020)
B. ningboense	MW683325	-
B. orientale	LC642725	Yang et al. (2022)
B. pectinatum	LC556092	Yang et al. (2020)
B. pentaneurum	MW161051	Tang et al. (2021)
B. pingnanense	MW822749	Zhang et al. (2021)
B. plumosum	MN580547	Zavala-Páez et al. (2020)
B. reptans	LC642726	Yang et al. (2022)
B. shanicum	PP315909*	This study
B. tianguii	MZ983368	-
B. triste	PP315910*	This study
B. violaceolabellum	PP315911*	This study
Out group
Dendrobium . chrysanthum	LC490683	Li et al. (2020)
D. findlayanum	MZ424316	Chen et al. (2022)
D. hercoglossum	LC490400	Li et al. (2020)
D. longicornu	LC635347	Xue et al. (2023)
D. moschatum	OM161978	Yang et al. (2022)
Note: An asterisk (*) indicates the sequences are newly sequenced in this study.
