# Supplementary material for: The Complete Chloroplast Genomes of Bulbophyllum (Orchidaceae) Species: Insight into Genome Structure Divergence and Phylogenetic Analysis
Source: Int J Mol Sci. 2024 Feb 25;25(5):2665. doi: 10.3390/ijms25052665 (PMC10932260; doi:10.3390/ijms25052665)
Supplement: Supplementary file 1 [file ijms-25-02665-s001.zip › Supplementary Table S10.xlsx]

## Sheet: Sheet1
Supplementary Table S10 Pseudogenization and loss of ndh genes in 28 Bulbophyllum cp genomes.
Species	ndh genes loss/pseudogenization	ndhJ	ndhK	ndhC	ndhB	ndhF	ndhD	ndhE	ndhG	ndhI	ndhA	ndhH	ndhB
Bulbophyllum affine	-/-	＋	＋	＋	＋	＋	＋	＋	＋	＋	＋	＋	＋
B. ambrosia	-/-	＋	＋	＋	＋	＋	＋	＋	＋	＋	＋	＋	＋
B. andersonii	-/-	＋	＋	＋	＋	＋	＋	＋	＋	＋	＋	＋	＋
B. crassipes	-/-	＋	＋	＋	＋	＋	＋	＋	＋	＋	＋	＋	＋
B. disciflorum	1/8	＋	Ψ	Ψ	＋	－	Ψ	Ψ	Ψ	Ψ	Ψ	Ψ	＋
B. exaltatum	3/7	－	－	＋	Ψ	－	Ψ	Ψ	＋	Ψ	Ψ	Ψ	Ψ
B. farreri	-/-	＋	＋	＋	＋	＋	＋	＋	＋	＋	＋	＋	＋
B. gedangense	-/-	＋	＋	＋	＋	＋	＋	＋	＋	＋	＋	＋	＋
B. granulosum	7/2	－	Ψ	－	＋	－	Ψ	－	Ψ	Ψ	Ψ	Ψ	＋
B. hamatum	4/2	＋	－	－	＋	－	Ψ	＋	＋	－	＋	Ψ	＋
B. hirtum	-/-	＋	＋	＋	＋	＋	＋	＋	＋	＋	＋	＋	＋
B. inconspicuum	5/3	＋	Ψ	＋	＋	－	Ψ	Ψ	－	－	－	－	＋
B. kwangtungense	3/1	＋	＋	＋	＋	Ψ	＋	＋	＋	－	－	Ψ	＋
B. leopardinum	-/-	＋	＋	＋	＋	＋	＋	＋	＋	＋	＋	＋	＋
B. lingii	-/-	＋	＋	＋	＋	＋	＋	＋	＋	＋	＋	＋	＋
B. menghaiense	-/-	＋	＋	＋	＋	＋	＋	＋	＋	＋	＋	＋	＋
B. mentosum	7/5	－	－	Ψ	Ψ	－	－	－	Ψ	Ψ	－	－	Ψ
B. ningboense	4/2	＋	＋	＋	＋	－	Ψ	＋	－	Ψ	－	－	＋
B. orientale	-/-	＋	＋	＋	＋	＋	＋	＋	＋	＋	＋	＋	＋
B. pectinatum	-/-	＋	＋	＋	＋	＋	＋	＋	＋	＋	＋	＋	＋
B. pentaneurum	-/-	＋	＋	＋	＋	＋	＋	＋	＋	＋	＋	＋	＋
B. pingnanense	4/2	＋	＋	＋	＋	－	Ψ	＋	－	Ψ	－	－	＋
B. plumosum	7/5	－	－	Ψ	Ψ	－	Ψ	Ψ	－	－	－	－	Ψ
B. reptans	-/-	＋	＋	＋	＋	＋	＋	＋	＋	＋	＋	＋	＋
B. shanicum	-/-	＋	＋	＋	＋	＋	＋	＋	＋	＋	＋	＋	＋
B. tianguii	5/4	Ψ	－	－	＋	－	Ψ	＋	－	－	Ψ	Ψ	＋
B. triste	-/-	＋	＋	＋	＋	＋	＋	＋	＋	＋	＋	＋	＋
B.violaceolabellum	-/-	＋	＋	＋	＋	＋	＋	＋	＋	＋	＋	＋	＋
“＋”indicate active genes, “Ψ” indicate pseudogenes, “－” indicate gene loss.
