# Supplementary material for: The Complete Chloroplast Genomes of Bulbophyllum (Orchidaceae) Species: Insight into Genome Structure Divergence and Phylogenetic Analysis
Source: Int J Mol Sci. 2024 Feb 25;25(5):2665. doi: 10.3390/ijms25052665 (PMC10932260; doi:10.3390/ijms25052665)
Supplement: Supplementary file 1 [file ijms-25-02665-s001.zip › Supplementary Table S11.xlsx]

## Sheet: Sheet1
Supplementary Table S11 The groups divided by ABGD analysis of 28 Bulbophyllum.
Initial Partition with prior maximal distance P=1.29e-03 ; Barcode gap distance = 0.007
Distance K80 Kimura MinSlope=0.200000
Group[ 1 ] n: 1 ;id: 001 Bulbophyllum_affine
Group[ 2 ] n: 1 ;id: 002 Bulbophyllum_ambrosia
Group[ 3 ] n: 2 ;id: 003 Bulbophyllum_andersonii 013 Bulbophyllum_kwangtungense
Group[ 4 ] n: 2 ;id: 004 Bulbophyllum_crassipes 019 Bulbophyllum_orientale
Group[ 5 ] n: 1 ;id: 005 Bulbophyllum_disciflorum
Group[ 6 ] n: 1 ;id: 006 Bulbophyllum_exaltatum
Group[ 7 ] n: 1 ;id: 007 Bulbophyllum_farreri
Group[ 8 ] n: 1 ;id: 008 Bulbophyllum_gedangense
Group[ 9 ] n: 1 ;id: 009 Bulbophyllum_granulosum
Group[ 10 ] n: 3 ;id: 010 Bulbophyllum_hamatum 026 Bulbophyllum_tianguii 028 Bulbophyllum_violaceolabellum
Group[ 11 ] n: 1 ;id: 011 Bulbophyllum_hirtum
Group[ 12 ] n: 3 ;id: 012 Bulbophyllum_inconspicuum 018 Bulbophyllum_ningboense 022 Bulbophyllum_pingnanense
Group[ 13 ] n: 2 ;id: 014 Bulbophyllum_leopardinum 020 Bulbophyllum_pectinatum
Group[ 14 ] n: 1 ;id: 015 Bulbophyllum_lingii
Group[ 15 ] n: 1 ;id: 016 Bulbophyllum_menghaiense
Group[ 16 ] n: 1 ;id: 017 Bulbophyllum_mentosum
Group[ 17 ] n: 1 ;id: 021 Bulbophyllum_pentaneurum
Group[ 18 ] n: 1 ;id: 023 Bulbophyllum_plumosum
Group[ 19 ] n: 1 ;id: 024 Bulbophyllum_reptans
Group[ 20 ] n: 2 ;id: 025 Bulbophyllum_shanicum 027 Bulbophyllum_triste
