# Supplementary material for: The Complete Chloroplast Genomes of Bulbophyllum (Orchidaceae) Species: Insight into Genome Structure Divergence and Phylogenetic Analysis
Source: Int J Mol Sci. 2024 Feb 25;25(5):2665. doi: 10.3390/ijms25052665 (PMC10932260; doi:10.3390/ijms25052665)
Supplement: Supplementary file 1 [file ijms-25-02665-s001.zip › Supplementary Table S12.xlsx]

## Sheet: Sheet1
Supplementary Table S12 Molecular diagnostic characteristics (MDCs) in whole cp genomes and four datasets of 28 Bulbophyllum.
Species	Alignmnent length	Number of analyzed species	Number of analyzed specimens	Number of MDCs	Sum of MDCs in a genus	MDCs per alignment length x 10-4	Average number
Whole cp genomes	178460	28			31641		1130.04
Bulbophyllum affine			1	503		0.00281856
B. ambrosia			1	755		0.00423064
B. andersonii			1	339		0.00189959
B. crassipes			1	8603		0.0482069
B. disciflorum			1	1065		0.00596772
B. exaltatum			1	2146		0.0120251
B. farreri			1	611		0.00342374
B. gedangense			1	1252		0.00701558
B. granulosum			1	2866		0.0160596
B. hamatum			1	359		0.00201166
B. hirtum			1	1220		0.00683627
B. inconspicuum			1	874		0.00489746
B. kwangtungense			1	577		0.00323322
B. leopardinum			1	345		0.00193321
B. lingii			1	847		0.00474616
B. menghaiense			1	1492		0.00836042
B. mentosum			1	1008		0.00564832
B. ningboense			1	191		0.00107027
B. orientale			1	233		0.00130561
B. pectinatum			1	357		0.00200045
B. pentaneurum			1	800		0.0044828
B. pingnanense			1	149		0.000834921
B. plumosum			1	2080		0.0116553
B. reptans			1	849		0.00475737
B. shanicum			1	601		0.0033677
B. tianguii			1	334		0.00187157
B. triste			1	657		0.0036815
B.violaceolabellum			1	528		0.00295865
5 coding genes	8368	28			2203		78.6786
B. affine			1	43		0.00513862
B. ambrosia			1	55		0.00657266
B. andersonii			1	24		0.00286807
B. crassipes			1	66		0.00788719
B. disciflorum			1	141		0.0168499
B. exaltatum			1	750		0.0896272
B. farreri			1	24		0.00286807
B. gedangense			1	82		0.00979924
B. granulosum			1	63		0.00752868
B. hamatum			1	18		0.00215105
B. hirtum			1	48		0.00573614
B. inconspicuum			1	35		0.0041826
B. kwangtungense			1	25		0.00298757
B. leopardinum			1	46		0.00549713
B. lingii			1	117		0.0139818
B. menghaiense			1	52		0.00621415
B. mentosum			1	32		0.00382409
B. ningboense			1	3		0.000358509
B. orientale			1	10		0.00119503
B. pectinatum			1	9		0.00107553
B. pentaneurum			1	39		0.00466061
B. pingnanense			1	10		0.00119503
B. plumosum			1	366		0.043738
B. reptans			1	54		0.00645315
B. shanicum			1	21		0.00250956
B. tianguii			1	26		0.00310707
B. triste			1	23		0.00274857
B.violaceolabellum			1	21		0.00250956
6 noncoding regions	4582	28			1534		54.7857
B. affine			1	42		0.0091663
B. ambrosia			1	40		0.00872981
B. andersonii			1	41		0.00894806
B. crassipes			1	26		0.00567438
B. disciflorum			1	46		0.0100393
B. exaltatum			1	153		0.0333915
B. farreri			1	25		0.00545613
B. gedangense			1	39		0.00851157
B. granulosum			1	71		0.0154954
B. hamatum			1	12		0.00261894
B. hirtum			1	50		0.0109123
B. inconspicuum			1	25		0.00545613
B. kwangtungense			1	232		0.0506329
B. leopardinum			1	13		0.00283719
B. lingii			1	113		0.0246617
B. menghaiense			1	106		0.023134
B. mentosum			1	65		0.0141859
B. ningboense			1	3		0.000654736
B. orientale			1	36		0.00785683
B. pectinatum			1	16		0.00349192
B. pentaneurum			1	26		0.00567438
B. pingnanense			1	26		0.00567438
B. plumosum			1	119		0.0259712
B. reptans			1	52		0.0113488
B. shanicum			1	41		0.00894806
B. tianguii			1	42		0.0091663
B. triste			1	61		0.013313
B.violaceolabellum			1	13		0.00283719
ycf1	5960	28			1435		51.25
B. affine			1	35		0.00587248
B. ambrosia			1	44		0.00738255
B. andersonii			1	24		0.00402685
B. crassipes			1	64		0.0107383
B. disciflorum			1	136		0.0228188
B. exaltatum			1	68		0.0114094
B. farreri			1	16		0.00268456
B. gedangense			1	68		0.0114094
B. granulosum			1	52		0.00872483
B. hamatum			1	13		0.00218121
B. hirtum			1	42		0.00704698
B. inconspicuum			1	29		0.00486577
B. kwangtungense			1	22		0.00369128
B. leopardinum			1	45		0.00755034
B. lingii			1	107		0.017953
B. menghaiense			1	44		0.00738255
B. mentosum			1	26		0.00436242
B. ningboense			1	2		0.00033557
B. orientale			1	10		0.00167785
B. pectinatum			1	8		0.00134228
B. pentaneurum			1	31		0.00520134
B. pingnanense			1	9		0.00151007
B. plumosum			1	372		0.0624161
B. reptans			1	59		0.00989933
B. shanicum			1	16		0.00268456
B. tianguii			1	23		0.00385906
B. triste			1	51		0.00855705
B.violaceolabellum			1	19		0.00318792
rpl32-trnLUAG	857	28			249		8.89286
B. affine			1	13		0.0151692
B. ambrosia			1	22		0.0256709
B. andersonii			1	27		0.0315053
B. crassipes			1	8		0.00933489
B. disciflorum			1	18		0.0210035
B. exaltatum			1	7		0.00816803
B. farreri			1	5		0.00583431
B. gedangense			1	5		0.00583431
B. granulosum			1	6		0.00700117
B. hamatum			1	3		0.00350058
B. hirtum			1	2		0.00233372
B. inconspicuum			1	9		0.0105018
B. kwangtungense			1	1		0.00116686
B. leopardinum			1	0		0
B. lingii			1	16		0.0186698
B. menghaiense			1	45		0.0525088
B. mentosum			1	10		0.0116686
B. ningboense			1	0		0
B. orientale			1	0		0
B. pectinatum			1	2		0.00233372
B. pentaneurum			1	3		0.00350058
B. pingnanense			1	18		0.0210035
B. plumosum			1	9		0.0105018
B. reptans			1	7		0.00816803
B. shanicum			1	5		0.00583431
B. tianguii			1	2		0.00233372
B. triste			1	3		0.00350058
B.violaceolabellum			1	3		0.00350058
